# Supplementary material
Source: publisher figshare collection journal article supplement (https://acs.figshare.com/ndownloader/files/5882151)
Supplement: Supplementary file 1 [file 5882151]

# om020502g.cif

data_Complex5
#---------------------------------------------------------------------------
_audit_creation_date                  'Thu Apr 12 15:29:36 2002'
_audit_creation_method                'from TEXRAY.INF file'
_audit_update_record                   ?
#---------------------------------------------------------------------------
_computing_data_collection            'MSC/AFC Diffractometer Control'
_computing_cell_refinement            'MSC/AFC Diffractometer Control'
_computing_data_reduction             'teXsan'
_computing_structure_solution          'DIRDIF92 (PATTY)'
_computing_structure_refinement       'teXsan'
_computing_publication_material       'teXsan'
_computing_molecular_graphics          ?
#---------------------------------------------------------------------------
_chemical_compound_source              ?
_chemical_name_common                  ?
_chemical_formula_weight               763.99
_chemical_formula_analytical           ?
_chemical_formula_sum                  'C34 H52 Ru3 '
_chemical_formula_moiety               'C34 H52 Ru3 '
_chemical_formula_structural           ?
_chemical_melting_point                ?
#---------------------------------------------------------------------------
_cell_length_a                         16.306(6)
_cell_length_b                         18.66(1)
_cell_length_c                         11.109(8)
_cell_angle_alpha                      89.95(6)
_cell_angle_beta                       105.62(4)
_cell_angle_gamma                      89.96(6)
_cell_volume                           3254(5)
_cell_formula_units_Z                  4
_cell_measurement_temperature          296.2
_cell_measurement_reflns_used          0
_cell_measurement_theta_min            0.0
_cell_measurement_theta_max            0.0
#---------------------------------------------------------------------------
_symmetry_cell_setting                 monoclinic
_symmetry_space_group_name_H-M        'P 21/n       '
_symmetry_Int_Tables_number            14
_symmetry_space_group_name_Hall        ?
loop_
_symmetry_equiv_pos_as_xyz
x,y,z
1/2-x,1/2+y,1/2-z
-x,-y,-z
1/2+x,1/2-y,1/2+z
_exptl_crystal_description            'prismatic'
_exptl_crystal_colour                 'red'
_exptl_crystal_size_max                0.150
_exptl_crystal_size_mid                0.200
_exptl_crystal_size_min                0.250
_exptl_crystal_density_diffrn          1.559
_exptl_crystal_density_meas            'not measured'
_exptl_crystal_F_000                   1552.00
_exptl_absorpt_coefficient_mu          1.395
_exptl_absorpt_correction_type        '\y scans(North,Phillips &
Mathews,1968)'
_exptl_absorpt_correction_T_max        0.995
_exptl_absorpt_correction_T_min        0.726
_exptl_special_details
;
 ?
;
#---------------------------------------------------------------------------
_diffrn_special_details
;
 ?
;
_diffrn_ambient_temperature            296.2
_diffrn_radiation_wavelength           0.7107
_diffrn_radiation_type                'Mo K\a'
_diffrn_radiation_source              'Rigaku rotating anode'
_diffrn_radiation_monochromator        graphite
_diffrn_radiation_detector            'scintillation counter'
_diffrn_measurement_device            'Rigaku AFC5R'
_diffrn_measurement_method
_diffrn_standards_number              3
_diffrn_standards_interval_count      0
_diffrn_standards_decay_%             -0.19
loop_
_diffrn_standard_refln_index_h
_diffrn_standard_refln_index_k
_diffrn_standard_refln_index_l
      3      -8     -3
      1      -3      7
      4      -6     -4
_diffrn_reflns_number                  6261
_reflns_number_total                   6244
_reflns_number_observed                3639
_reflns_observed_criterion             >5.0sigma(I)
_diffrn_reflns_av_R_equivalents        0.006
_diffrn_reflns_av_sigmaI/netI          0.000
_diffrn_reflns_limit_h_min             -19
_diffrn_reflns_limit_h_max             18
_diffrn_reflns_limit_k_min             -22
_diffrn_reflns_limit_k_max             0
_diffrn_reflns_limit_l_min             0
_diffrn_reflns_limit_l_max             13
_diffrn_reflns_theta_min               0.00
_diffrn_reflns_theta_max               0.00
_diffrn_reflns_reduction_process      'Lp corrections applied'
_diffrn_orient_matrix_UB_11           -0.00315
_diffrn_orient_matrix_UB_12            0.04803
_diffrn_orient_matrix_UB_13           -0.04100
_diffrn_orient_matrix_UB_21            0.00840
_diffrn_orient_matrix_UB_22           -0.02314
_diffrn_orient_matrix_UB_23           -0.07697
_diffrn_orient_matrix_UB_31           -0.06304
_diffrn_orient_matrix_UB_32           -0.00543
_diffrn_orient_matrix_UB_33           -0.03363
#---------------------------------------------------------------------------
loop_
_atom_type_symbol
_atom_type_oxidation_number
_atom_type_number_in_cell
_atom_type_scat_dispersion_real
_atom_type_scat_dispersion_imag
_atom_type_scat_source
  C  0   136 0.003 0.002
;International Tables for Crystallography
(1992, Vol. C, Tables 4.2.6.8 and 6.1.1.1)
;
  H  0   208 0.000 0.000
;International Tables for Crystallography
(1992, Vol. C, Table 6.1.1.2)
;
  Ru 0    12 -1.259 0.836
;International Tables for Crystallography
(1992, Vol. C, Tables 4.2.6.8 and 6.1.1.1)
;
#---------------------------------------------------------------------------
loop_
_atom_site_label
_atom_site_fract_x
_atom_site_fract_y
_atom_site_fract_z
_atom_site_U_iso_or_equiv
_atom_site_thermal_displace_type
_atom_site_calc_flag
_atom_site_calc_attached_atom
_atom_site_occupancy
_atom_site_refinement_flags
 Ru(1)  0.42009(8)  0.32759(6)  0.1579(1)   0.0404(4)   Uani d . 1.00 .
 Ru(2)  0.41591(8)  0.23593(6)  0.3480(1)   0.0398(3)   Uani d . 1.00 .
 Ru(3)  0.42472(9)  0.18324(6)  0.1222(1)   0.0419(4)   Uani d . 1.00 .
 C(1)   0.5017(8)   0.2538(9)   0.245(1)    0.052(5)    Uani d . 1.00 .
 C(2)   0.5914(9)   0.2523(8)   0.292(1)    0.060(5)    Uani d . 1.00 .
 C(3)   0.314(1)    0.256(1)    0.094(2)    0.060(7)    Uani d . 0.80 .
 C(4)   0.313(2)    0.215(2)    0.189(3)    0.06(1)     Uani d . 0.60 .
 C(4A)  0.314(2)    0.279(1)    0.205(2)    0.047(8)    Uani d . 0.60 .
 C(5)   0.505(1)    0.4117(9)   0.110(2)    0.068(7)    Uani d . 1.00 .
 C(6)   0.434(2)    0.4016(8)   0.008(2)    0.075(7)    Uani d . 1.00 .
 C(7)   0.360(1)    0.421(1)    0.043(2)    0.086(8)    Uani d . 1.00 .
 C(8)   0.390(2)    0.4415(9)   0.165(2)    0.077(8)    Uani d . 1.00 .
 C(9)   0.475(2)    0.4363(9)   0.207(2)    0.068(6)    Uani d . 1.00 .
 C(10)  0.597(2)    0.407(1)    0.113(4)    0.21(2)     Uani d . 1.00 .
 C(11)  0.435(3)    0.380(1)    -0.125(2)   0.26(2)     Uani d . 1.00 .
 C(12)  0.272(2)    0.423(1)    -0.039(3)   0.20(1)     Uani d . 1.00 .
 C(13)  0.334(2)    0.476(1)    0.239(3)    0.21(2)     Uani d . 1.00 .
 C(14)  0.530(2)    0.459(1)    0.333(2)    0.17(1)     Uani d . 1.00 .
 C(15)  0.344(1)    0.213(1)    0.492(1)    0.061(6)    Uani d . 1.00 .
 C(16)  0.408(1)    0.1578(8)   0.500(1)    0.049(5)    Uani d . 1.00 .
 C(17)  0.490(1)    0.1911(8)   0.535(1)    0.048(5)    Uani d . 1.00 .
 C(18)  0.477(1)    0.2661(9)   0.547(1)    0.050(5)    Uani d . 1.00 .
 C(19)  0.389(1)    0.2817(8)   0.519(1)    0.050(5)    Uani d . 1.00 .
 C(20)  0.250(1)    0.201(1)    0.461(2)    0.118(9)    Uani d . 1.00 .
 C(21)  0.392(1)    0.081(1)    0.487(2)    0.100(8)    Uani d . 1.00 .
 C(22)  0.571(1)    0.153(1)    0.568(2)    0.089(8)    Uani d . 1.00 .
 C(23)  0.544(1)    0.319(1)    0.596(1)    0.089(7)    Uani d . 1.00 .
 C(24)  0.345(2)    0.351(1)    0.528(2)    0.110(9)    Uani d . 1.00 .
 C(25)  0.514(1)    0.100(1)    0.082(3)    0.098(9)    Uani d . 1.00 .
 C(26)  0.482(1)    0.1405(9)   -0.025(2)   0.068(7)    Uani d . 1.00 .
 C(27)  0.394(1)    0.1320(9)   -0.062(2)   0.068(7)    Uani d . 1.00 .
 C(28)  0.373(2)    0.086(1)    0.018(3)    0.088(9)    Uani d . 1.00 .
 C(29)  0.447(3)    0.066(1)    0.103(2)    0.12(1)     Uani d . 1.00 .
 C(30)  0.601(2)    0.085(2)    0.151(4)    0.32(2)     Uani d . 1.00 .
 C(31)  0.533(2)    0.187(1)    -0.093(3)   0.25(2)     Uani d . 1.00 .
 C(32)  0.334(2)    0.163(2)    -0.178(2)   0.18(1)     Uani d . 1.00 .
 C(33)  0.286(2)    0.059(2)    0.003(4)    0.24(2)     Uani d . 1.00 .
 C(34)  0.450(4)    0.010(1)    0.203(3)    0.31(2)     Uani d . 1.00 .
 H(1)   0.6196      0.2622      0.2268      0.0702      Uiso calc . 1.00 .
 H(2)   0.6116      0.2884      0.3557      0.0702      Uiso calc . 1.00 .
 H(3)   0.6130      0.2070      0.3282      0.0702      Uiso calc . 1.00 .
 H(4)   0.6256      0.4524      0.1305      0.2177      Uiso calc . 1.00 .
 H(5)   0.6277      0.3747      0.1812      0.2177      Uiso calc . 1.00 .
 H(6)   0.6064      0.3883      0.0383      0.2177      Uiso calc . 1.00 .
 H(7)   0.4916      0.3695      -0.1283     0.2617      Uiso calc . 1.00 .
 H(8)   0.4002      0.3386      -0.1539     0.2617      Uiso calc . 1.00 .
 H(9)   0.4136      0.4182      -0.1842     0.2617      Uiso calc . 1.00 .
 H(10)  0.2553      0.3748      -0.0780     0.2152      Uiso calc . 1.00 .
 H(11)  0.2302      0.4357      0.0001      0.2152      Uiso calc . 1.00 .
 H(12)  0.2674      0.4542      -0.1108     0.2152      Uiso calc . 1.00 .
 H(13)  0.3052      0.5177      0.1987      0.2105      Uiso calc . 1.00 .
 H(14)  0.2861      0.4420      0.2422      0.2105      Uiso calc . 1.00 .
 H(15)  0.3623      0.4858      0.3219      0.2105      Uiso calc . 1.00 .
 H(16)  0.5239      0.5089      0.3472      0.2081      Uiso calc . 1.00 .
 H(17)  0.5150      0.4331      0.3995      0.2081      Uiso calc . 1.00 .
 H(18)  0.5890      0.4494      0.3405      0.2081      Uiso calc . 1.00 .
 H(19)  0.2363      0.1679      0.5208      0.1325      Uiso calc . 1.00 .
 H(20)  0.2198      0.2435      0.4608      0.1325      Uiso calc . 1.00 .
 H(21)  0.2297      0.1780      0.3799      0.1325      Uiso calc . 1.00 .
 H(22)  0.4151      0.0555      0.5646      0.1063      Uiso calc . 1.00 .
 H(23)  0.3310      0.0699      0.4621      0.1063      Uiso calc . 1.00 .
 H(24)  0.4155      0.0595      0.4252      0.1063      Uiso calc . 1.00 .
 H(25)  0.6195      0.1859      0.5886      0.1013      Uiso calc . 1.00 .
 H(26)  0.5779      0.1221      0.6395      0.1013      Uiso calc . 1.00 .
 H(27)  0.5795      0.1234      0.5005      0.1013      Uiso calc . 1.00 .
 H(28)  0.5434      0.3593      0.5388      0.1013      Uiso calc . 1.00 .
 H(29)  0.5439      0.3397      0.6748      0.1013      Uiso calc . 1.00 .
 H(30)  0.6022      0.2985      0.6088      0.1013      Uiso calc . 1.00 .
 H(31)  0.3028      0.3631      0.4502      0.1178      Uiso calc . 1.00 .
 H(32)  0.3159      0.3509      0.5923      0.1178      Uiso calc . 1.00 .
 H(33)  0.3846      0.3911      0.5451      0.1178      Uiso calc . 1.00 .
 H(34)  0.6401      0.1120      0.1302      0.3550      Uiso calc . 1.00 .
 H(35)  0.6071      0.0914      0.2442      0.3550      Uiso calc . 1.00 .
 H(36)  0.6139      0.0335      0.1471      0.3550      Uiso calc . 1.00 .
 H(37)  0.5236      0.1713      -0.1798     0.2576      Uiso calc . 1.00 .
 H(38)  0.5126      0.2370      -0.0999     0.2576      Uiso calc . 1.00 .
 H(39)  0.5915      0.1875      -0.0552     0.2576      Uiso calc . 1.00 .
 H(40)  0.3075      0.1321      -0.2395     0.1748      Uiso calc . 1.00 .
 H(41)  0.2923      0.1960      -0.1589     0.1748      Uiso calc . 1.00 .
 H(42)  0.3673      0.1981      -0.2200     0.1748      Uiso calc . 1.00 .
 H(43)  0.2779      0.0277      0.0644      0.2091      Uiso calc . 1.00 .
 H(44)  0.2442      0.1003      0.0024      0.2091      Uiso calc . 1.00 .
 H(45)  0.2597      0.0370      -0.0791     0.2091      Uiso calc . 1.00 .
 H(46)  0.4954      0.0013      0.2541      0.3031      Uiso calc . 1.00 .
 H(47)  0.4031      0.0240      0.2502      0.3031      Uiso calc . 1.00 .
 H(48)  0.4187      -0.0356     0.1614      0.3031      Uiso calc . 1.00 .

loop_
_atom_site_aniso_label
_atom_site_aniso_U_11
_atom_site_aniso_U_22
_atom_site_aniso_U_33
_atom_site_aniso_U_12
_atom_site_aniso_U_13
_atom_site_aniso_U_23
 Ru(1)  0.0586(9)   0.0331(6)   0.0348(7)   0.0013(6)   0.0215(6)
0.0050(6)
 Ru(2)  0.0614(8)   0.0375(7)   0.0274(6)   -0.0020(6)  0.0236(6)
0.0003(5)
 Ru(3)  0.0666(10)  0.0350(6)   0.0289(6)   0.0001(7)
0.0212(6)   -0.0038(6)
 C(1)   0.032(8)    0.09(1)     0.042(9)    -0.019(9)
.018(7)    -0.009(9)
 C(2)   0.06(1)     0.06(1)     0.06(1)     -0.003(10)  0.024(9)    0.002(9)
 C(3)   0.06(1)     0.06(1)     0.06(1)     0.00(1)     0.02(1)     0.01(1)
 C(4)   0.05(2)     0.08(2)     0.07(2)     0.02(2)     0.04(2)     0.00(2)
 C(4A)  0.07(2)     0.03(1)     0.05(2)     -0.03(1)    0.03(1)     -0.02(1)
 C(5)   0.07(2)     0.04(1)     0.11(2)     0.007(9)    0.05(1)     0.02(1)
 C(6)   0.17(2)     0.019(8)    0.05(1)     -0.01(1)    0.05(1)     0.010(8)
 C(7)   0.06(1)     0.07(1)     0.10(2)     -0.01(1)    -0.03(1)    0.05(1)
 C(8)   0.11(2)     0.04(1)     0.10(2)     0.02(1)     0.06(2)     0.03(1)
 C(9)   0.10(2)     0.04(1)     0.05(1)     -0.02(1)    0.00(1)     0.000(9)
 C(10)  0.11(2)     0.14(2)     0.42(5)     0.04(2)     0.16(3)     0.16(3)
 C(11)  0.68(8)     0.05(1)     0.08(2)     -0.03(3)    0.18(3)     0.01(1)
 C(12)  0.08(2)     0.16(2)     0.28(4)     -0.06(2)    -0.08(2)    0.15(3)
 C(13)  0.35(5)     0.09(2)     0.31(4)     0.12(2)     0.28(4)     0.08(2)
 C(14)  0.31(4)     0.08(2)     0.08(2)     -0.09(2)    -0.04(2)    0.01(1)
 C(15)  0.04(1)     0.12(2)     0.028(8)    -0.01(1)    0.017(8)
0.012(10)
 C(16)  0.08(1)     0.049(10)   0.030(8)    -0.007(9)   0.032(9)    0.009(7)
 C(17)  0.05(1)     0.06(1)     0.037(9)    0.015(9)    0.019(8)    0.014(8)
 C(18)  0.06(1)     0.06(1)     0.023(8)    -0.023(9)
.010(8)    -0.006(8)
 C(19)  0.09(1)     0.041(9)    0.030(8)    0.002(9)
0.033(9)    -0.006(7)
 C(20)  0.06(1)     0.22(3)     0.08(1)     -0.02(2)    0.04(1)     0.03(2)
 C(21)  0.17(2)     0.07(1)     0.07(1)     -0.03(1)    0.05(1)     0.02(1)
 C(22)  0.11(2)     0.11(2)     0.06(1)     0.03(1)     0.04(1)     0.04(1)
 C(23)  0.12(2)     0.10(1)     0.04(1)     -0.04(1)    0.01(1)     -0.01(1)
 C(24)  0.18(2)     0.10(2)     0.06(1)     0.08(2)     0.06(2)     0.00(1)
 C(25)  0.08(2)     0.08(2)     0.10(2)     0.04(1)     -0.04(1)    -0.06(2)
 C(26)  0.09(2)     0.05(1)     0.09(2)     0.01(1)     0.06(1)     -0.03(1)
 C(27)  0.10(2)     0.05(1)     0.04(1)     0.02(1)
0.00(1)     -0.028(9)
 C(28)  0.12(2)     0.06(1)     0.11(2)     -0.04(1)    0.08(2)     -0.04(1)
 C(29)  0.29(5)     0.03(1)     0.04(1)     0.04(2)
0.07(2)     -0.002(10)
 C(30)  0.15(3)     0.35(5)     0.34(5)     0.19(3)     -0.15(3)    -0.30(4)
 C(31)  0.40(5)     0.13(2)     0.37(4)     -0.12(3)    0.37(4)     -0.13(3)
 C(32)  0.25(3)     0.19(3)     0.06(1)     0.11(3)     -0.04(2)    -0.05(2)
 C(33)  0.24(4)     0.17(3)     0.40(5)     -0.15(3)    0.24(4)     -0.20(3)
 C(34)  0.82(10)    0.05(1)     0.12(2)     0.14(3)     0.24(4)     0.04(1)
#---------------------------------------------------------------------------
_refine_special_details
;
 ?
;
_refine_ls_structure_factor_coef       F
_refine_ls_matrix_type                 full
_refine_ls_weighting_scheme            'w = 1/[\s^2^(Fo) + 0.00001|Fo|^2^]'
_refine_ls_hydrogen_treatment          noref
_refine_ls_extinction_method           none
_refine_ls_extinction_coef             ?
_refine_ls_abs_structure_details       ?
_refine_ls_abs_structure_Flack         ?
_refine_ls_number_reflns               3639
_refine_ls_number_parameters           343
_refine_ls_number_restraints           0
_refine_ls_number_constraints          0
_refine_ls_R_factor_all                ?
_refine_ls_R_factor_obs                0.0660
_refine_ls_wR_factor_all               ?
_refine_ls_wR_factor_obs               0.0650
_refine_ls_goodness_of_fit_all         ?
_refine_ls_goodness_of_fit_obs         3.650
_refine_ls_shift/esd_max               0.1800
_refine_ls_shift/esd_mean              0.0000
_refine_diff_density_min               -2.02
_refine_diff_density_max               3.01
#---------------------------------------------------------------------------
_geom_special_details
;
 ?
;
loop_
_geom_bond_atom_site_label_1
_geom_bond_atom_site_label_2
_geom_bond_distance
_geom_bond_site_symmetry_1
_geom_bond_site_symmetry_2
_geom_bond_publ_flag
 Ru(1)     Ru(2)     2.731(2)   1_555 1_555 yes
 Ru(1)     Ru(3)     2.727(2)   1_555 1_555 yes
 Ru(1)     C(1)      1.98(2)    1_555 1_555 yes
 Ru(1)     C(3)      2.16(2)    1_555 1_555 yes
 Ru(1)     C(4A)     2.14(2)    1_555 1_555 yes
 Ru(1)     C(5)      2.25(2)    1_555 1_555 yes
 Ru(1)     C(6)      2.22(1)    1_555 1_555 yes
 Ru(1)     C(7)      2.23(2)    1_555 1_555 yes
 Ru(1)     C(8)      2.19(2)    1_555 1_555 yes
 Ru(1)     C(9)      2.23(2)    1_555 1_555 yes
 Ru(2)     Ru(3)     2.734(2)   1_555 1_555 yes
 Ru(2)     C(1)      2.06(1)    1_555 1_555 yes
 Ru(2)     C(4)      2.12(3)    1_555 1_555 yes
 Ru(2)     C(4A)     2.12(3)    1_555 1_555 yes
 Ru(2)     C(15)     2.27(1)    1_555 1_555 yes
 Ru(2)     C(16)     2.26(1)    1_555 1_555 yes
 Ru(2)     C(17)     2.26(1)    1_555 1_555 yes
 Ru(2)     C(18)     2.24(1)    1_555 1_555 yes
 Ru(2)     C(19)     2.24(1)    1_555 1_555 yes
 Ru(3)     C(1)      2.06(1)    1_555 1_555 yes
 Ru(3)     C(3)      2.21(2)    1_555 1_555 yes
 Ru(3)     C(4)      2.22(2)    1_555 1_555 yes
 Ru(3)     C(25)     2.26(2)    1_555 1_555 yes
 Ru(3)     C(26)     2.23(1)    1_555 1_555 yes
 Ru(3)     C(27)     2.19(1)    1_555 1_555 yes
 Ru(3)     C(28)     2.20(2)    1_555 1_555 yes
 Ru(3)     C(29)     2.23(2)    1_555 1_555 yes
 C(1)      C(2)      1.41(2)    1_555 1_555 yes
 C(2)      H(1)      0.972      1_555 1_555 no
 C(2)      H(2)      0.971      1_555 1_555 no
 C(2)      H(3)      0.962      1_555 1_555 no
 C(3)      C(4)      1.30(3)    1_555 1_555 yes
 C(3)      C(4A)     1.31(3)    1_555 1_555 yes
 C(4)      C(4A)     1.22(3)    1_555 1_555 yes
 C(5)      C(6)      1.39(3)    1_555 1_555 yes
 C(5)      C(9)      1.37(2)    1_555 1_555 yes
 C(5)      C(10)     1.50(3)    1_555 1_555 yes
 C(6)      C(7)      1.42(3)    1_555 1_555 yes
 C(6)      C(11)     1.53(2)    1_555 1_555 yes
 C(7)      C(8)      1.37(3)    1_555 1_555 yes
 C(7)      C(12)     1.47(3)    1_555 1_555 yes
 C(8)      C(9)      1.34(2)    1_555 1_555 yes
 C(8)      C(13)     1.53(3)    1_555 1_555 yes
 C(9)      C(14)     1.51(3)    1_555 1_555 yes
 C(10)     H(4)      0.961      1_555 1_555 no
 C(10)     H(5)      0.986      1_555 1_555 no
 C(10)     H(6)      0.951      1_555 1_555 no
 C(11)     H(7)      0.961      1_555 1_555 no
 C(11)     H(8)      0.966      1_555 1_555 no
 C(11)     H(9)      0.962      1_555 1_555 no
 C(12)     H(10)     1.006      1_555 1_555 no
 C(12)     H(11)     0.934      1_555 1_555 no
 C(12)     H(12)     0.977      1_555 1_555 no
 C(13)     H(13)     0.958      1_555 1_555 no
 C(13)     H(14)     1.013      1_555 1_555 no
 C(13)     H(15)     0.932      1_555 1_555 no
 C(14)     H(16)     0.944      1_555 1_555 no
 C(14)     H(17)     0.965      1_555 1_555 no
 C(14)     H(18)     0.968      1_555 1_555 no
 C(15)     C(16)     1.44(2)    1_555 1_555 yes
 C(15)     C(19)     1.47(2)    1_555 1_555 yes
 C(15)     C(20)     1.49(2)    1_555 1_555 yes
 C(16)     C(17)     1.43(2)    1_555 1_555 yes
 C(16)     C(21)     1.46(2)    1_555 1_555 yes
 C(17)     C(18)     1.43(2)    1_555 1_555 yes
 C(17)     C(22)     1.47(2)    1_555 1_555 yes
 C(18)     C(19)     1.42(2)    1_555 1_555 yes
 C(18)     C(23)     1.47(2)    1_555 1_555 yes
 C(19)     C(24)     1.49(2)    1_555 1_555 yes
 C(20)     H(19)     0.979      1_555 1_555 no
 C(20)     H(20)     0.933      1_555 1_555 no
 C(20)     H(21)     0.977      1_555 1_555 no
 C(21)     H(22)     0.963      1_555 1_555 no
 C(21)     H(23)     0.972      1_555 1_555 no
 C(21)     H(24)     0.965      1_555 1_555 no
 C(22)     H(25)     0.975      1_555 1_555 no
 C(22)     H(26)     0.960      1_555 1_555 no
 C(22)     H(27)     0.971      1_555 1_555 no
 C(23)     H(28)     0.980      1_555 1_555 no
 C(23)     H(29)     0.964      1_555 1_555 no
 C(23)     H(30)     0.990      1_555 1_555 no
 C(24)     H(31)     0.975      1_555 1_555 no
 C(24)     H(32)     0.955      1_555 1_555 no
 C(24)     H(33)     0.979      1_555 1_555 no
 C(25)     C(26)     1.38(3)    1_555 1_555 yes
 C(25)     C(29)     1.35(3)    1_555 1_555 yes
 C(25)     C(30)     1.44(3)    1_555 1_555 yes
 C(26)     C(27)     1.38(2)    1_555 1_555 yes
 C(26)     C(31)     1.55(3)    1_555 1_555 yes
 C(27)     C(28)     1.35(2)    1_555 1_555 yes
 C(27)     C(32)     1.51(3)    1_555 1_555 yes
 C(28)     C(29)     1.37(3)    1_555 1_555 yes
 C(28)     C(33)     1.48(3)    1_555 1_555 yes
 C(29)     C(34)     1.52(3)    1_555 1_555 yes
 C(30)     H(34)     0.891      1_555 1_555 no
 C(30)     H(35)     1.021      1_555 1_555 no
 C(30)     H(36)     0.993      1_555 1_555 no
 C(31)     H(37)     0.977      1_555 1_555 no
 C(31)     H(38)     0.984      1_555 1_555 no
 C(31)     H(39)     0.928      1_555 1_555 no
 C(32)     H(40)     0.912      1_555 1_555 no
 C(32)     H(41)     0.978      1_555 1_555 no
 C(32)     H(42)     1.037      1_555 1_555 no
 C(33)     H(43)     0.931      1_555 1_555 no
 C(33)     H(44)     1.022      1_555 1_555 no
 C(33)     H(45)     0.989      1_555 1_555 no
 C(34)     H(46)     0.820      1_555 1_555 no
 C(34)     H(47)     1.061      1_555 1_555 no
 C(34)     H(48)     1.035      1_555 1_555 no
#---------------------------------------------------------------------------
loop_
_geom_angle_atom_site_label_1
_geom_angle_atom_site_label_2
_geom_angle_atom_site_label_3
_geom_angle
_geom_angle_site_symmetry_1
_geom_angle_site_symmetry_2
_geom_angle_site_symmetry_3
_geom_angle_publ_flag
   Ru(2)     Ru(1)     Ru(3)     60.13(5)   1_555 1_555 1_555 yes
   Ru(2)     Ru(1)     C(1)      48.7(4)    1_555 1_555 1_555 yes
   Ru(2)     Ru(1)     C(3)      71.2(5)    1_555 1_555 1_555 yes
   Ru(2)     Ru(1)     C(4A)     49.9(8)    1_555 1_555 1_555 yes
   Ru(2)     Ru(1)     C(5)      139.9(6)   1_555 1_555 1_555 yes
   Ru(2)     Ru(1)     C(6)      175.7(8)   1_555 1_555 1_555 yes
   Ru(2)     Ru(1)     C(7)      146.5(7)   1_555 1_555 1_555 yes
   Ru(2)     Ru(1)     C(8)      121.8(5)   1_555 1_555 1_555 yes
   Ru(2)     Ru(1)     C(9)      118.3(5)   1_555 1_555 1_555 yes
   Ru(3)     Ru(1)     C(1)      48.9(4)    1_555 1_555 1_555 yes
   Ru(3)     Ru(1)     C(3)      52.2(5)    1_555 1_555 1_555 yes
   Ru(3)     Ru(1)     C(4A)     70.9(7)    1_555 1_555 1_555 yes
   Ru(3)     Ru(1)     C(5)      127.8(5)   1_555 1_555 1_555 yes
   Ru(3)     Ru(1)     C(6)      119.4(4)   1_555 1_555 1_555 yes
   Ru(3)     Ru(1)     C(7)      135.8(7)   1_555 1_555 1_555 yes
   Ru(3)     Ru(1)     C(8)      168.7(7)   1_555 1_555 1_555 yes
   Ru(3)     Ru(1)     C(9)      155.6(6)   1_555 1_555 1_555 yes
   C(1)      Ru(1)     C(3)      95.8(7)    1_555 1_555 1_555 yes
   C(1)      Ru(1)     C(4A)     93.9(8)    1_555 1_555 1_555 yes
   C(1)      Ru(1)     C(5)      103.1(6)   1_555 1_555 1_555 yes
   C(1)      Ru(1)     C(6)      127.4(8)   1_555 1_555 1_555 yes
   C(1)      Ru(1)     C(7)      163.8(7)   1_555 1_555 1_555 yes
   C(1)      Ru(1)     C(8)      141.8(9)   1_555 1_555 1_555 yes
   C(1)      Ru(1)     C(9)      109.9(7)   1_555 1_555 1_555 yes
   C(3)      Ru(1)     C(4A)     35.4(7)    1_555 1_555 1_555 yes
   C(3)      Ru(1)     C(5)      148.1(8)   1_555 1_555 1_555 yes
   C(3)      Ru(1)     C(6)      112.2(8)   1_555 1_555 1_555 yes
   C(3)      Ru(1)     C(7)      96.4(7)    1_555 1_555 1_555 yes
   C(3)      Ru(1)     C(8)      116.8(9)   1_555 1_555 1_555 yes
   C(3)      Ru(1)     C(9)      152.2(8)   1_555 1_555 1_555 yes
   C(4A)     Ru(1)     C(5)      160.5(8)   1_555 1_555 1_555 yes
   C(4A)     Ru(1)     C(6)      134(1)     1_555 1_555 1_555 yes
   C(4A)     Ru(1)     C(7)      102.2(10)  1_555 1_555 1_555 yes
   C(4A)     Ru(1)     C(8)      101.5(9)   1_555 1_555 1_555 yes
   C(4A)     Ru(1)     C(9)      128.8(9)   1_555 1_555 1_555 yes
   C(5)      Ru(1)     C(6)      36.3(7)    1_555 1_555 1_555 yes
   C(5)      Ru(1)     C(7)      61.3(7)    1_555 1_555 1_555 yes
   C(5)      Ru(1)     C(8)      59.1(7)    1_555 1_555 1_555 yes
   C(5)      Ru(1)     C(9)      35.6(6)    1_555 1_555 1_555 yes
   C(6)      Ru(1)     C(7)      37.1(7)    1_555 1_555 1_555 yes
   C(6)      Ru(1)     C(8)      59.6(7)    1_555 1_555 1_555 yes
   C(6)      Ru(1)     C(9)      60.0(6)    1_555 1_555 1_555 yes
   C(7)      Ru(1)     C(8)      36.0(7)    1_555 1_555 1_555 yes
   C(7)      Ru(1)     C(9)      60.7(7)    1_555 1_555 1_555 yes
   C(8)      Ru(1)     C(9)      35.3(7)    1_555 1_555 1_555 yes
   Ru(1)     Ru(2)     Ru(3)     59.86(5)   1_555 1_555 1_555 yes
   Ru(1)     Ru(2)     C(1)      46.1(4)    1_555 1_555 1_555 yes
   Ru(1)     Ru(2)     C(4)      69.7(8)    1_555 1_555 1_555 yes
   Ru(1)     Ru(2)     C(4A)     50.4(6)    1_555 1_555 1_555 yes
   Ru(1)     Ru(2)     C(15)     142.4(5)   1_555 1_555 1_555 yes
   Ru(1)     Ru(2)     C(16)     177.6(4)   1_555 1_555 1_555 yes
   Ru(1)     Ru(2)     C(17)     145.4(4)   1_555 1_555 1_555 yes
   Ru(1)     Ru(2)     C(18)     120.6(4)   1_555 1_555 1_555 yes
   Ru(1)     Ru(2)     C(19)     118.1(4)   1_555 1_555 1_555 yes
   Ru(3)     Ru(2)     C(1)      48.5(4)    1_555 1_555 1_555 yes
   Ru(3)     Ru(2)     C(4)      52.7(6)    1_555 1_555 1_555 yes
   Ru(3)     Ru(2)     C(4A)     71.0(6)    1_555 1_555 1_555 yes
   Ru(3)     Ru(2)     C(15)     138.1(5)   1_555 1_555 1_555 yes
   Ru(3)     Ru(2)     C(16)     118.7(4)   1_555 1_555 1_555 yes
   Ru(3)     Ru(2)     C(17)     124.2(4)   1_555 1_555 1_555 yes
   Ru(3)     Ru(2)     C(18)     151.4(4)   1_555 1_555 1_555 yes
   Ru(3)     Ru(2)     C(19)     171.7(5)   1_555 1_555 1_555 yes
   C(1)      Ru(2)     C(4)      94.1(8)    1_555 1_555 1_555 yes
   C(1)      Ru(2)     C(4A)     92.0(8)    1_555 1_555 1_555 yes
   C(1)      Ru(2)     C(15)     169.0(6)   1_555 1_555 1_555 yes
   C(1)      Ru(2)     C(16)     134.8(6)   1_555 1_555 1_555 yes
   C(1)      Ru(2)     C(17)     107.2(5)   1_555 1_555 1_555 yes
   C(1)      Ru(2)     C(18)     108.7(5)   1_555 1_555 1_555 yes
   C(1)      Ru(2)     C(19)     137.0(6)   1_555 1_555 1_555 yes
   C(4)      Ru(2)     C(4A)     33.3(8)    1_555 1_555 1_555 yes
   C(4)      Ru(2)     C(15)     96.2(8)    1_555 1_555 1_555 yes
   C(4)      Ru(2)     C(16)     107.9(9)   1_555 1_555 1_555 yes
   C(4)      Ru(2)     C(17)     143.2(9)   1_555 1_555 1_555 yes
   C(4)      Ru(2)     C(18)     155.6(8)   1_555 1_555 1_555 yes
   C(4)      Ru(2)     C(19)     119.1(8)   1_555 1_555 1_555 yes
   C(4A)     Ru(2)     C(15)     98.7(8)    1_555 1_555 1_555 yes
   C(4A)     Ru(2)     C(16)     127.7(8)   1_555 1_555 1_555 yes
   C(4A)     Ru(2)     C(17)     160.5(8)   1_555 1_555 1_555 yes
   C(4A)     Ru(2)     C(18)     133.9(8)   1_555 1_555 1_555 yes
   C(4A)     Ru(2)     C(19)     101.4(8)   1_555 1_555 1_555 yes
   C(15)     Ru(2)     C(16)     37.2(5)    1_555 1_555 1_555 yes
   C(15)     Ru(2)     C(17)     61.9(5)    1_555 1_555 1_555 yes
   C(15)     Ru(2)     C(18)     61.7(5)    1_555 1_555 1_555 yes
   C(15)     Ru(2)     C(19)     38.1(5)    1_555 1_555 1_555 yes
   C(16)     Ru(2)     C(17)     36.9(5)    1_555 1_555 1_555 yes
   C(16)     Ru(2)     C(18)     61.6(5)    1_555 1_555 1_555 yes
   C(16)     Ru(2)     C(19)     63.0(5)    1_555 1_555 1_555 yes
   C(17)     Ru(2)     C(18)     37.0(5)    1_555 1_555 1_555 yes
   C(17)     Ru(2)     C(19)     62.5(5)    1_555 1_555 1_555 yes
   C(18)     Ru(2)     C(19)     36.9(5)    1_555 1_555 1_555 yes
   Ru(1)     Ru(3)     Ru(2)     60.02(5)   1_555 1_555 1_555 yes
   Ru(1)     Ru(3)     C(1)      46.2(5)    1_555 1_555 1_555 yes
   Ru(1)     Ru(3)     C(3)      50.5(5)    1_555 1_555 1_555 yes
   Ru(1)     Ru(3)     C(4)      68.6(8)    1_555 1_555 1_555 yes
   Ru(1)     Ru(3)     C(25)     138.7(8)   1_555 1_555 1_555 yes
   Ru(1)     Ru(3)     C(26)     119.5(5)   1_555 1_555 1_555 yes
   Ru(1)     Ru(3)     C(27)     124.0(5)   1_555 1_555 1_555 yes
   Ru(1)     Ru(3)     C(28)     150.7(9)   1_555 1_555 1_555 yes
   Ru(1)     Ru(3)     C(29)     172(1)     1_555 1_555 1_555 yes
   Ru(2)     Ru(3)     C(1)      48.4(4)    1_555 1_555 1_555 yes
   Ru(2)     Ru(3)     C(3)      70.5(5)    1_555 1_555 1_555 yes
   Ru(2)     Ru(3)     C(4)      49.4(8)    1_555 1_555 1_555 yes
   Ru(2)     Ru(3)     C(25)     128.8(7)   1_555 1_555 1_555 yes
   Ru(2)     Ru(3)     C(26)     159.2(6)   1_555 1_555 1_555 yes
   Ru(2)     Ru(3)     C(27)     163.6(6)   1_555 1_555 1_555 yes
   Ru(2)     Ru(3)     C(28)     132.4(6)   1_555 1_555 1_555 yes
   Ru(2)     Ru(3)     C(29)     119.3(5)   1_555 1_555 1_555 yes
   C(1)      Ru(3)     C(3)      91.8(7)    1_555 1_555 1_555 yes
   C(1)      Ru(3)     C(4)      91.1(9)    1_555 1_555 1_555 yes
   C(1)      Ru(3)     C(25)     105.0(7)   1_555 1_555 1_555 yes
   C(1)      Ru(3)     C(26)     114.4(7)   1_555 1_555 1_555 yes
   C(1)      Ru(3)     C(27)     147.3(7)   1_555 1_555 1_555 yes
   C(1)      Ru(3)     C(28)     162.9(10)  1_555 1_555 1_555 yes
   C(1)      Ru(3)     C(29)     127(1)     1_555 1_555 1_555 yes
   C(3)      Ru(3)     C(4)      34.2(8)    1_555 1_555 1_555 yes
   C(3)      Ru(3)     C(25)     160.2(8)   1_555 1_555 1_555 yes
   C(3)      Ru(3)     C(26)     127.0(8)   1_555 1_555 1_555 yes
   C(3)      Ru(3)     C(27)     99.5(7)    1_555 1_555 1_555 yes
   C(3)      Ru(3)     C(28)     104.4(9)   1_555 1_555 1_555 yes
   C(3)      Ru(3)     C(29)     136(1)     1_555 1_555 1_555 yes
   C(4)      Ru(3)     C(25)     151(1)     1_555 1_555 1_555 yes
   C(4)      Ru(3)     C(26)     151(1)     1_555 1_555 1_555 yes
   C(4)      Ru(3)     C(27)     115.2(10)  1_555 1_555 1_555 yes
   C(4)      Ru(3)     C(28)     99.3(10)   1_555 1_555 1_555 yes
   C(4)      Ru(3)     C(29)     117(1)     1_555 1_555 1_555 yes
   C(25)     Ru(3)     C(26)     35.8(8)    1_555 1_555 1_555 yes
   C(25)     Ru(3)     C(27)     60.6(7)    1_555 1_555 1_555 yes
   C(25)     Ru(3)     C(28)     60.3(8)    1_555 1_555 1_555 yes
   C(25)     Ru(3)     C(29)     35.0(8)    1_555 1_555 1_555 yes
   C(26)     Ru(3)     C(27)     36.4(6)    1_555 1_555 1_555 yes
   C(26)     Ru(3)     C(28)     59.6(7)    1_555 1_555 1_555 yes
   C(26)     Ru(3)     C(29)     58.1(7)    1_555 1_555 1_555 yes
   C(27)     Ru(3)     C(28)     35.7(7)    1_555 1_555 1_555 yes
   C(27)     Ru(3)     C(29)     59.1(7)    1_555 1_555 1_555 yes
   C(28)     Ru(3)     C(29)     35.8(9)    1_555 1_555 1_555 yes
   Ru(1)     C(1)      Ru(2)     85.2(5)    1_555 1_555 1_555 yes
   Ru(1)     C(1)      Ru(3)     84.9(5)    1_555 1_555 1_555 yes
   Ru(1)     C(1)      C(2)      133(1)     1_555 1_555 1_555 yes
   Ru(2)     C(1)      Ru(3)     83.1(5)    1_555 1_555 1_555 yes
   Ru(2)     C(1)      C(2)      125(1)     1_555 1_555 1_555 yes
   Ru(3)     C(1)      C(2)      128(1)     1_555 1_555 1_555 yes
   C(1)      C(2)      H(1)      111(1)     1_555 1_555 1_555 no
   C(1)      C(2)      H(2)      111(1)     1_555 1_555 1_555 no
   C(1)      C(2)      H(3)      113(1)     1_555 1_555 1_555 no
   H(1)      C(2)      H(2)      105(1)     1_555 1_555 1_555 no
   H(1)      C(2)      H(3)      106(1)     1_555 1_555 1_555 no
   H(2)      C(2)      H(3)      106(1)     1_555 1_555 1_555 no
   Ru(1)     C(3)      Ru(3)     77.3(6)    1_555 1_555 1_555 yes
   Ru(1)     C(3)      C(4)      106(1)     1_555 1_555 1_555 yes
   Ru(1)     C(3)      C(4A)     71(1)      1_555 1_555 1_555 yes
   Ru(3)     C(3)      C(4)      73(1)      1_555 1_555 1_555 yes
   Ru(3)     C(3)      C(4A)     106(1)     1_555 1_555 1_555 yes
   C(4)      C(3)      C(4A)     55(1)      1_555 1_555 1_555 yes
   Ru(2)     C(4)      Ru(3)     77.9(9)    1_555 1_555 1_555 yes
   Ru(2)     C(4)      C(3)      112(2)     1_555 1_555 1_555 yes
   Ru(2)     C(4)      C(4A)     73(2)      1_555 1_555 1_555 yes
   Ru(3)     C(4)      C(3)      72(1)      1_555 1_555 1_555 yes
   Ru(3)     C(4)      C(4A)     109(2)     1_555 1_555 1_555 yes
   C(3)      C(4)      C(4A)     62(2)      1_555 1_555 1_555 yes
   Ru(1)     C(4A)     Ru(2)     79.7(9)    1_555 1_555 1_555 yes
   Ru(1)     C(4A)     C(3)      73(1)      1_555 1_555 1_555 yes
   Ru(1)     C(4A)     C(4)      111(2)     1_555 1_555 1_555 yes
   Ru(2)     C(4A)     C(3)      112(1)     1_555 1_555 1_555 yes
   Ru(2)     C(4A)     C(4)      73(2)      1_555 1_555 1_555 yes
   C(3)      C(4A)     C(4)      62(1)      1_555 1_555 1_555 yes
   Ru(1)     C(5)      C(6)      70.9(10)   1_555 1_555 1_555 yes
   Ru(1)     C(5)      C(9)      71.4(10)   1_555 1_555 1_555 yes
   Ru(1)     C(5)      C(10)     129(1)     1_555 1_555 1_555 yes
   C(6)      C(5)      C(9)      107(1)     1_555 1_555 1_555 yes
   C(6)      C(5)      C(10)     127(2)     1_555 1_555 1_555 yes
   C(9)      C(5)      C(10)     124(2)     1_555 1_555 1_555 yes
   Ru(1)     C(6)      C(5)      72.8(10)   1_555 1_555 1_555 yes
   Ru(1)     C(6)      C(7)      71.7(10)   1_555 1_555 1_555 yes
   Ru(1)     C(6)      C(11)     126(1)     1_555 1_555 1_555 yes
   C(5)      C(6)      C(7)      108(1)     1_555 1_555 1_555 yes
   C(5)      C(6)      C(11)     127(2)     1_555 1_555 1_555 yes
   C(7)      C(6)      C(11)     124(3)     1_555 1_555 1_555 yes
   Ru(1)     C(7)      C(6)      71(1)      1_555 1_555 1_555 yes
   Ru(1)     C(7)      C(8)      70(1)      1_555 1_555 1_555 yes
   Ru(1)     C(7)      C(12)     124(1)     1_555 1_555 1_555 yes
   C(6)      C(7)      C(8)      103(1)     1_555 1_555 1_555 yes
   C(6)      C(7)      C(12)     126(2)     1_555 1_555 1_555 yes
   C(8)      C(7)      C(12)     129(3)     1_555 1_555 1_555 yes
   Ru(1)     C(8)      C(7)      73(1)      1_555 1_555 1_555 yes
   Ru(1)     C(8)      C(9)      74(1)      1_555 1_555 1_555 yes
   Ru(1)     C(8)      C(13)     126(1)     1_555 1_555 1_555 yes
   C(7)      C(8)      C(9)      112(1)     1_555 1_555 1_555 yes
   C(7)      C(8)      C(13)     122(2)     1_555 1_555 1_555 yes
   C(9)      C(8)      C(13)     124(2)     1_555 1_555 1_555 yes
   Ru(1)     C(9)      C(5)      72(1)      1_555 1_555 1_555 yes
   Ru(1)     C(9)      C(8)      70(1)      1_555 1_555 1_555 yes
   Ru(1)     C(9)      C(14)     125(1)     1_555 1_555 1_555 yes
   C(5)      C(9)      C(8)      107(1)     1_555 1_555 1_555 yes
   C(5)      C(9)      C(14)     125(2)     1_555 1_555 1_555 yes
   C(8)      C(9)      C(14)     126(2)     1_555 1_555 1_555 yes
   C(5)      C(10)     H(4)      112(2)     1_555 1_555 1_555 no
   C(5)      C(10)     H(5)      110(2)     1_555 1_555 1_555 no
   C(5)      C(10)     H(6)      113(3)     1_555 1_555 1_555 no
   H(4)      C(10)     H(5)      105(3)     1_555 1_555 1_555 no
   H(4)      C(10)     H(6)      108(2)     1_555 1_555 1_555 no
   H(5)      C(10)     H(6)      106(2)     1_555 1_555 1_555 no
   C(6)      C(11)     H(7)      110(3)     1_555 1_555 1_555 no
   C(6)      C(11)     H(8)      112(2)     1_555 1_555 1_555 no
   C(6)      C(11)     H(9)      112(2)     1_555 1_555 1_555 no
   H(7)      C(11)     H(8)      107(2)     1_555 1_555 1_555 no
   H(7)      C(11)     H(9)      107(2)     1_555 1_555 1_555 no
   H(8)      C(11)     H(9)      107(3)     1_555 1_555 1_555 no
   C(7)      C(12)     H(10)     111(2)     1_555 1_555 1_555 no
   C(7)      C(12)     H(11)     115(3)     1_555 1_555 1_555 no
   C(7)      C(12)     H(12)     111(2)     1_555 1_555 1_555 no
   H(10)     C(12)     H(11)     106(2)     1_555 1_555 1_555 no
   H(10)     C(12)     H(12)     102(3)     1_555 1_555 1_555 no
   H(11)     C(12)     H(12)     108(2)     1_555 1_555 1_555 no
   C(8)      C(13)     H(13)     112(2)     1_555 1_555 1_555 no
   C(8)      C(13)     H(14)     109(2)     1_555 1_555 1_555 no
   C(8)      C(13)     H(15)     113(2)     1_555 1_555 1_555 no
   H(13)     C(13)     H(14)     103(3)     1_555 1_555 1_555 no
   H(13)     C(13)     H(15)     110(2)     1_555 1_555 1_555 no
   H(14)     C(13)     H(15)     105(2)     1_555 1_555 1_555 no
   C(9)      C(14)     H(16)     111(2)     1_555 1_555 1_555 no
   C(9)      C(14)     H(17)     111(1)     1_555 1_555 1_555 no
   C(9)      C(14)     H(18)     110(2)     1_555 1_555 1_555 no
   H(16)     C(14)     H(17)     108(2)     1_555 1_555 1_555 no
   H(16)     C(14)     H(18)     108(2)     1_555 1_555 1_555 no
   H(17)     C(14)     H(18)     106(2)     1_555 1_555 1_555 no
   Ru(2)     C(15)     C(16)     71.1(8)    1_555 1_555 1_555 yes
   Ru(2)     C(15)     C(19)     69.8(8)    1_555 1_555 1_555 yes
   Ru(2)     C(15)     C(20)     123(1)     1_555 1_555 1_555 yes
   C(16)     C(15)     C(19)     107(1)     1_555 1_555 1_555 yes
   C(16)     C(15)     C(20)     126(1)     1_555 1_555 1_555 yes
   C(19)     C(15)     C(20)     126(1)     1_555 1_555 1_555 yes
   Ru(2)     C(16)     C(15)     71.8(8)    1_555 1_555 1_555 yes
   Ru(2)     C(16)     C(17)     71.5(8)    1_555 1_555 1_555 yes
   Ru(2)     C(16)     C(21)     127(1)     1_555 1_555 1_555 yes
   C(15)     C(16)     C(17)     108(1)     1_555 1_555 1_555 yes
   C(15)     C(16)     C(21)     125(1)     1_555 1_555 1_555 yes
   C(17)     C(16)     C(21)     125(1)     1_555 1_555 1_555 yes
   Ru(2)     C(17)     C(16)     71.7(8)    1_555 1_555 1_555 yes
   Ru(2)     C(17)     C(18)     70.9(8)    1_555 1_555 1_555 yes
   Ru(2)     C(17)     C(22)     129(1)     1_555 1_555 1_555 yes
   C(16)     C(17)     C(18)     107(1)     1_555 1_555 1_555 yes
   C(16)     C(17)     C(22)     125(1)     1_555 1_555 1_555 yes
   C(18)     C(17)     C(22)     126(1)     1_555 1_555 1_555 yes
   Ru(2)     C(18)     C(17)     72.1(8)    1_555 1_555 1_555 yes
   Ru(2)     C(18)     C(19)     71.4(8)    1_555 1_555 1_555 yes
   Ru(2)     C(18)     C(23)     128(1)     1_555 1_555 1_555 yes
   C(17)     C(18)     C(19)     110(1)     1_555 1_555 1_555 yes
   C(17)     C(18)     C(23)     125(1)     1_555 1_555 1_555 yes
   C(19)     C(18)     C(23)     124(1)     1_555 1_555 1_555 yes
   Ru(2)     C(19)     C(15)     72.0(8)    1_555 1_555 1_555 yes
   Ru(2)     C(19)     C(18)     71.7(8)    1_555 1_555 1_555 yes
   Ru(2)     C(19)     C(24)     126(1)     1_555 1_555 1_555 yes
   C(15)     C(19)     C(18)     106(1)     1_555 1_555 1_555 yes
   C(15)     C(19)     C(24)     123(1)     1_555 1_555 1_555 yes
   C(18)     C(19)     C(24)     129(1)     1_555 1_555 1_555 yes
   C(15)     C(20)     H(19)     110(1)     1_555 1_555 1_555 no
   C(15)     C(20)     H(20)     113(2)     1_555 1_555 1_555 no
   C(15)     C(20)     H(21)     110(1)     1_555 1_555 1_555 no
   H(19)     C(20)     H(20)     108(1)     1_555 1_555 1_555 no
   H(19)     C(20)     H(21)     104(2)     1_555 1_555 1_555 no
   H(20)     C(20)     H(21)     108(1)     1_555 1_555 1_555 no
   C(16)     C(21)     H(22)     112(1)     1_555 1_555 1_555 no
   C(16)     C(21)     H(23)     112(1)     1_555 1_555 1_555 no
   C(16)     C(21)     H(24)     111(1)     1_555 1_555 1_555 no
   H(22)     C(21)     H(23)     106(1)     1_555 1_555 1_555 no
   H(22)     C(21)     H(24)     107(2)     1_555 1_555 1_555 no
   H(23)     C(21)     H(24)     106(1)     1_555 1_555 1_555 no
   C(17)     C(22)     H(25)     111(1)     1_555 1_555 1_555 no
   C(17)     C(22)     H(26)     113(1)     1_555 1_555 1_555 no
   C(17)     C(22)     H(27)     112(1)     1_555 1_555 1_555 no
   H(25)     C(22)     H(26)     106(1)     1_555 1_555 1_555 no
   H(25)     C(22)     H(27)     105(1)     1_555 1_555 1_555 no
   H(26)     C(22)     H(27)     106(1)     1_555 1_555 1_555 no
   C(18)     C(23)     H(28)     113(1)     1_555 1_555 1_555 no
   C(18)     C(23)     H(29)     114(1)     1_555 1_555 1_555 no
   C(18)     C(23)     H(30)     112(1)     1_555 1_555 1_555 no
   H(28)     C(23)     H(29)     105(1)     1_555 1_555 1_555 no
   H(28)     C(23)     H(30)     103(1)     1_555 1_555 1_555 no
   H(29)     C(23)     H(30)     105(1)     1_555 1_555 1_555 no
   C(19)     C(24)     H(31)     112(1)     1_555 1_555 1_555 no
   C(19)     C(24)     H(32)     113(1)     1_555 1_555 1_555 no
   C(19)     C(24)     H(33)     111(1)     1_555 1_555 1_555 no
   H(31)     C(24)     H(32)     107(2)     1_555 1_555 1_555 no
   H(31)     C(24)     H(33)     105(1)     1_555 1_555 1_555 no
   H(32)     C(24)     H(33)     106(1)     1_555 1_555 1_555 no
   Ru(3)     C(25)     C(26)     71.1(10)   1_555 1_555 1_555 yes
   Ru(3)     C(25)     C(29)     71(1)      1_555 1_555 1_555 yes
   Ru(3)     C(25)     C(30)     128(1)     1_555 1_555 1_555 yes
   C(26)     C(25)     C(29)     105(2)     1_555 1_555 1_555 yes
   C(26)     C(25)     C(30)     131(3)     1_555 1_555 1_555 yes
   C(29)     C(25)     C(30)     122(4)     1_555 1_555 1_555 yes
   Ru(3)     C(26)     C(25)     73(1)      1_555 1_555 1_555 yes
   Ru(3)     C(26)     C(27)     70.2(9)    1_555 1_555 1_555 yes
   Ru(3)     C(26)     C(31)     123(1)     1_555 1_555 1_555 yes
   C(25)     C(26)     C(27)     108(1)     1_555 1_555 1_555 yes
   C(25)     C(26)     C(31)     126(2)     1_555 1_555 1_555 yes
   C(27)     C(26)     C(31)     124(2)     1_555 1_555 1_555 yes
   Ru(3)     C(27)     C(26)     73.4(10)   1_555 1_555 1_555 yes
   Ru(3)     C(27)     C(28)     72(1)      1_555 1_555 1_555 yes
   Ru(3)     C(27)     C(32)     124(1)     1_555 1_555 1_555 yes
   C(26)     C(27)     C(28)     107(1)     1_555 1_555 1_555 yes
   C(26)     C(27)     C(32)     126(2)     1_555 1_555 1_555 yes
   C(28)     C(27)     C(32)     125(2)     1_555 1_555 1_555 yes
   Ru(3)     C(28)     C(27)     71.6(10)   1_555 1_555 1_555 yes
   Ru(3)     C(28)     C(29)     73(1)      1_555 1_555 1_555 yes
   Ru(3)     C(28)     C(33)     123(1)     1_555 1_555 1_555 yes
   C(27)     C(28)     C(29)     106(2)     1_555 1_555 1_555 yes
   C(27)     C(28)     C(33)     123(3)     1_555 1_555 1_555 yes
   C(29)     C(28)     C(33)     129(3)     1_555 1_555 1_555 yes
   Ru(3)     C(29)     C(25)     73(1)      1_555 1_555 1_555 yes
   Ru(3)     C(29)     C(28)     71(1)      1_555 1_555 1_555 yes
   Ru(3)     C(29)     C(34)     125(1)     1_555 1_555 1_555 yes
   C(25)     C(29)     C(28)     111(2)     1_555 1_555 1_555 yes
   C(25)     C(29)     C(34)     126(4)     1_555 1_555 1_555 yes
   C(28)     C(29)     C(34)     122(3)     1_555 1_555 1_555 yes
   C(25)     C(30)     H(34)     115(4)     1_555 1_555 1_555 no
   C(25)     C(30)     H(35)     109(3)     1_555 1_555 1_555 no
   C(25)     C(30)     H(36)     111(2)     1_555 1_555 1_555 no
   H(34)     C(30)     H(35)     108(2)     1_555 1_555 1_555 no
   H(34)     C(30)     H(36)     110(2)     1_555 1_555 1_555 no
   H(35)     C(30)     H(36)     100(4)     1_555 1_555 1_555 no
   C(26)     C(31)     H(37)     110(2)     1_555 1_555 1_555 no
   C(26)     C(31)     H(38)     110(1)     1_555 1_555 1_555 no
   C(26)     C(31)     H(39)     113(3)     1_555 1_555 1_555 no
   H(37)     C(31)     H(38)     104(3)     1_555 1_555 1_555 no
   H(37)     C(31)     H(39)     109(2)     1_555 1_555 1_555 no
   H(38)     C(31)     H(39)     108(2)     1_555 1_555 1_555 no
   C(27)     C(32)     H(40)     117(2)     1_555 1_555 1_555 no
   C(27)     C(32)     H(41)     112(1)     1_555 1_555 1_555 no
   C(27)     C(32)     H(42)     108(2)     1_555 1_555 1_555 no
   H(40)     C(32)     H(41)     110(2)     1_555 1_555 1_555 no
   H(40)     C(32)     H(42)     105(2)     1_555 1_555 1_555 no
   H(41)     C(32)     H(42)     100(2)     1_555 1_555 1_555 no
   C(28)     C(33)     H(43)     116(4)     1_555 1_555 1_555 no
   C(28)     C(33)     H(44)     111(2)     1_555 1_555 1_555 no
   C(28)     C(33)     H(45)     113(2)     1_555 1_555 1_555 no
   H(43)     C(33)     H(44)     105(2)     1_555 1_555 1_555 no
   H(43)     C(33)     H(45)     107(2)     1_555 1_555 1_555 no
   H(44)     C(33)     H(45)     100(3)     1_555 1_555 1_555 no
   C(29)     C(34)     H(46)     118(4)     1_555 1_555 1_555 no
   C(29)     C(34)     H(47)     107(2)     1_555 1_555 1_555 no
   C(29)     C(34)     H(48)     108(2)     1_555 1_555 1_555 no
   H(46)     C(34)     H(47)     110(2)     1_555 1_555 1_555 no
   H(46)     C(34)     H(48)     113(2)     1_555 1_555 1_555 no
   H(47)     C(34)     H(48)     95(4)      1_555 1_555 1_555 no
#---------------------------------------------------------------------------
loop_
_geom_contact_atom_site_label_1
_geom_contact_atom_site_label_2
_geom_contact_distance
_geom_contact_site_symmetry_1
_geom_contact_site_symmetry_2
_geom_contact_publ_flag
 Ru(1)     Ru(2)     2.731(2)   1_555 1_555 ?
 Ru(1)     Ru(3)     2.727(2)   1_555 1_555 ?
 Ru(2)     Ru(3)     2.734(2)   1_555 1_555 ?
#---------------------------------------------------------------------------
_publ_requested_journal               ' Organometallics'

_publ_contact_author
;
 Hiroharu SUZUKI
 2-12-1 O-okayama, Meguro-Ku, Tokyo 152-8552, Japan
;
_publ_contact_letter
;
    ENTER TEXT OF LETTER
;

_publ_requested_coeditor_name          ?
_publ_contact_author_phone            ' +81-3-5734-2148 '
_publ_contact_author_fax              ' +81-3-5734-2148 '
_publ_contact_author_email            ' hiroharu@o.cc.titech.ac.jp '
loop_
_publ_author_name
_publ_author_address
' Toshiro TAKAO
  Toshifumi TAKEMORI
  Makoto MORIYA
  Hiroharu SUZUKI'
;
  2-12-1 O-okayama, Meguro-Ku, Tokyo 152-8552, Japan
;

_publ_section_title
;
 Skeletal Rearrangement of a C2 Unit on a Triruthenium Cluster.
 Synthesis of m-Ethylidene, m3-Ethylidyne, and m-Vinylidene Complexes
 by the Reaction of {Cp*Ru(m-H)}3(m3-H)2 with Acetylene.
;

_publ_section_abstract
;
    ENTER ABSTRACT
;

_publ_section_experimental
;
    ENTER EXPERIMENTAL SECTION
;

_publ_section_comment
;
    ENTER TEXT
;

_publ_section_references
;
    ENTER OTHER REFERENCES
Molecular Structure Corporation. (1995). teXsan.
Single Crystal Structure Analysis Software. Version 1.7.
MSC, 3200 Research Forest Drive, The Woodlands, TX 77381, USA.
North, A.C.T., Phillips, D. C. & Mathews, F. S. (1968).
Acta Cryst. A24, 351-359.
;

_publ_section_acknowledgements
;
    ENTER ACKNOWLEDGEMENTS
;

_publ_section_table_legends
;
    ENTER TABLE LEGENDS
;

_publ_section_figure_captions
;
    ENTER FIGURE CAPTIONS
;

#===END

data_Complex7
#---------------------------------------------------------------------------
_audit_creation_date                  'Thu Apr 12 15:37:42 2002'
_audit_creation_method                'from TEXRAY.INF file'
_audit_update_record                   ?
#---------------------------------------------------------------------------
_computing_data_collection            'MSC/AFC Diffractometer Control'
_computing_cell_refinement            'MSC/AFC Diffractometer Control'
_computing_data_reduction             'teXsan'
_computing_structure_solution          'DIRDIF92 (PATTY)'
_computing_structure_refinement       'teXsan'
_computing_publication_material       'teXsan'
_computing_molecular_graphics          ?
#---------------------------------------------------------------------------
_chemical_compound_source              ?
_chemical_name_common                  ?
_chemical_formula_weight               790.03
_chemical_formula_analytical           ?
_chemical_formula_sum                  'C36 H54 Ru3 '
_chemical_formula_moiety               'C36 H54 Ru3 '
_chemical_formula_structural           ?
_chemical_melting_point                ?
#---------------------------------------------------------------------------
_cell_length_a                         23.127(5)
_cell_length_b                         22.840(5)
_cell_length_c                         15.777(3)
_cell_angle_alpha                      90
_cell_angle_beta                       127.31(1)
_cell_angle_gamma                      90
_cell_volume                           6628(2)
_cell_formula_units_Z                  8
_cell_measurement_temperature          296.2
_cell_measurement_reflns_used          20
_cell_measurement_theta_min            9.7
_cell_measurement_theta_max            10.3
#---------------------------------------------------------------------------
_symmetry_cell_setting                 monoclinic
_symmetry_space_group_name_H-M        'C 2/c        '
_symmetry_Int_Tables_number            15
_symmetry_space_group_name_Hall        ?
loop_
_symmetry_equiv_pos_as_xyz
x,y,z
-x,y,1/2-z
-x,-y,-z
x,-y,1/2+z
1/2+x,1/2+y,z
1/2-x,1/2+y,1/2-z
1/2-x,1/2-y,-z
1/2+x,1/2-y,1/2+z
_exptl_crystal_description            'prismatic'
_exptl_crystal_colour                 'red'
_exptl_crystal_size_max                0.100
_exptl_crystal_size_mid                0.150
_exptl_crystal_size_min                0.200
_exptl_crystal_density_diffrn          1.583
_exptl_crystal_density_meas            'not measured'
_exptl_crystal_F_000                   3216.00
_exptl_absorpt_coefficient_mu          1.372
_exptl_absorpt_correction_type        '\y scans(North,Phillips &
Mathews,1968)'
_exptl_absorpt_correction_T_max        1.000
_exptl_absorpt_correction_T_min        0.919
_exptl_special_details
;
 ?
;
#---------------------------------------------------------------------------
_diffrn_special_details
;
 ?
;
_diffrn_ambient_temperature            296.2
_diffrn_radiation_wavelength           0.7107
_diffrn_radiation_type                'Mo K\a'
_diffrn_radiation_source              'Rigaku rotating anode'
_diffrn_radiation_monochromator        graphite
_diffrn_radiation_detector            'scintillation counter'
_diffrn_measurement_device            'Rigaku AFC5R'
_diffrn_measurement_method
_diffrn_standards_number              3
_diffrn_standards_interval_count      0
_diffrn_standards_decay_%             -0.58
loop_
_diffrn_standard_refln_index_h
_diffrn_standard_refln_index_k
_diffrn_standard_refln_index_l
      0       12     -2
      13      -1     -4
      3       1     -8
_diffrn_reflns_number                  6160
_reflns_number_total                   6003
_reflns_number_observed                4963
_reflns_observed_criterion             >3.0sigma(I)
_diffrn_reflns_av_R_equivalents        0.010
_diffrn_reflns_av_sigmaI/netI          0.000
_diffrn_reflns_limit_h_min             0
_diffrn_reflns_limit_h_max             27
_diffrn_reflns_limit_k_min             0
_diffrn_reflns_limit_k_max             27
_diffrn_reflns_limit_l_min             -18
_diffrn_reflns_limit_l_max             14
_diffrn_reflns_theta_min               0.00
_diffrn_reflns_theta_max               0.00
_diffrn_reflns_reduction_process      'Lp corrections applied'
_diffrn_orient_matrix_UB_11            0.00029
_diffrn_orient_matrix_UB_12            0.01703
_diffrn_orient_matrix_UB_13           -0.05813
_diffrn_orient_matrix_UB_21            0.01147
_diffrn_orient_matrix_UB_22            0.03941
_diffrn_orient_matrix_UB_23            0.03436
_diffrn_orient_matrix_UB_31            0.05314
_diffrn_orient_matrix_UB_32           -0.00860
_diffrn_orient_matrix_UB_33            0.04231
#---------------------------------------------------------------------------
loop_
_atom_type_symbol
_atom_type_oxidation_number
_atom_type_number_in_cell
_atom_type_scat_dispersion_real
_atom_type_scat_dispersion_imag
_atom_type_scat_source
  C  0   288 0.003 0.002
;International Tables for Crystallography
(1992, Vol. C, Tables 4.2.6.8 and 6.1.1.1)
;
  H  0   432 0.000 0.000
;International Tables for Crystallography
(1992, Vol. C, Table 6.1.1.2)
;
  Ru 0    24 -1.259 0.836
;International Tables for Crystallography
(1992, Vol. C, Tables 4.2.6.8 and 6.1.1.1)
;
#---------------------------------------------------------------------------
loop_
_atom_site_label
_atom_site_fract_x
_atom_site_fract_y
_atom_site_fract_z
_atom_site_U_iso_or_equiv
_atom_site_thermal_displace_type
_atom_site_calc_flag
_atom_site_calc_attached_atom
_atom_site_occupancy
_atom_site_refinement_flags
 Ru(1)  0.25269(2)  0.06098(1)  0.15010(3)  0.03152(9)  Uani d . 1.00 .
 Ru(2)  0.16666(2)  0.14504(2)  0.15428(3)  0.03456(10) Uani d . 1.00 .
 Ru(3)  0.31336(2)  0.14081(1)  0.31583(3)  0.03045(9)  Uani d . 1.00 .
 C(1)   0.2534(2)   0.1477(2)   0.1522(3)   0.030(1)    Uani d . 1.00 .
 C(2)   0.2671(2)   0.1871(2)   0.0909(3)   0.039(1)    Uani d . 1.00 .
 C(3)   0.2903(3)   0.0465(2)   0.3000(5)   0.039(2)    Uani d . 0.68 .
 C(3A)  0.1776(6)   0.0474(5)   0.1712(9)   0.031(4)    Uani d . 0.32 .
 C(4A)  0.1803(7)   0.0710(6)   0.257(1)    0.040(4)    Uani d . 0.32 .
 C(4)   0.2653(4)   0.0726(3)   0.3533(5)   0.037(2)    Uani d . 0.64(2)  .
 C(5)   0.2209(3)   0.1188(2)   0.3115(4)   0.044(1)    Uani d . 1.00 .
 C(6)   0.2061(3)   0.1443(2)   0.3855(4)   0.077(2)    Uani d . 1.00 .
 C(7)   0.2415(3)   0.0395(2)   -0.0024(4)  0.059(2)    Uani d . 1.00 .
 C(8)   0.2000(3)   0.0018(3)   0.0073(5)   0.068(2)    Uani d . 1.00 .
 C(9)   0.2445(5)   -0.0306(2)  0.0995(6)   0.077(2)    Uani d . 1.00 .
 C(10)  0.3163(3)   -0.0117(3)  0.1509(4)   0.074(2)    Uani d . 1.00 .
 C(11)  0.3128(3)   0.0325(2)   0.0846(5)   0.057(2)    Uani d . 1.00 .
 C(12)  0.2164(5)   0.0760(3)   -0.0994(5)  0.162(4)    Uani d . 1.00 .
 C(13)  0.1193(4)   -0.0087(4)  -0.0774(7)  0.196(4)    Uani d . 1.00 .
 C(14)  0.2222(7)   -0.0810(3)  0.1355(9)   0.236(7)    Uani d . 1.00 .
 C(15)  0.3818(5)   -0.0385(4)  0.2469(5)   0.220(4)    Uani d . 1.00 .
 C(16)  0.3756(5)   0.0597(4)   0.0951(9)   0.191(5)    Uani d . 1.00 .
 C(17)  0.0832(2)   0.1841(2)   -0.0072(4)  0.051(1)    Uani d . 1.00 .
 C(18)  0.1120(2)   0.2295(2)   0.0687(4)   0.048(1)    Uani d . 1.00 .
 C(19)  0.0940(3)   0.2172(2)   0.1385(4)   0.060(2)    Uani d . 1.00 .
 C(20)  0.0545(3)   0.1642(3)   0.1054(5)   0.068(2)    Uani d . 1.00 .
 C(21)  0.0494(2)   0.1427(2)   0.0167(4)   0.065(2)    Uani d . 1.00 .
 C(22)  0.0807(3)   0.1826(3)   -0.1048(4)  0.092(2)    Uani d . 1.00 .
 C(23)  0.1438(3)   0.2859(2)   0.0676(5)   0.087(2)    Uani d . 1.00 .
 C(24)  0.1031(4)   0.2605(3)   0.2181(5)   0.116(3)    Uani d . 1.00 .
 C(25)  0.0191(3)   0.1376(4)   0.1515(6)   0.133(3)    Uani d . 1.00 .
 C(26)  0.0061(3)   0.0905(3)   -0.0488(6)  0.121(3)    Uani d . 1.00 .
 C(27)  0.4190(2)   0.1785(2)   0.3620(3)   0.043(1)    Uani d . 1.00 .
 C(28)  0.3779(2)   0.2242(2)   0.3614(3)   0.044(1)    Uani d . 1.00 .
 C(29)  0.3672(3)   0.2114(2)   0.4394(4)   0.051(2)    Uani d . 1.00 .
 C(30)  0.4027(3)   0.1576(2)   0.4884(3)   0.054(2)    Uani d . 1.00 .
 C(31)  0.4330(2)   0.1363(2)   0.4388(3)   0.051(1)    Uani d . 1.00 .
 C(32)  0.4524(3)   0.1769(3)   0.3045(4)   0.071(2)    Uani d . 1.00 .
 C(33)  0.3600(3)   0.2820(2)   0.3056(4)   0.075(2)    Uani d . 1.00 .
 C(34)  0.3355(3)   0.2536(3)   0.4742(5)   0.090(2)    Uani d . 1.00 .
 C(35)  0.4124(3)   0.1303(3)   0.5832(4)   0.093(2)    Uani d . 1.00 .
 C(36)  0.4800(3)   0.0834(3)   0.4718(5)   0.089(2)    Uani d . 1.00 .
 H(2A)  0.3146      0.1807      0.1100      0.0455      Uiso calc . 1.00 .
 H(2B)  0.2320      0.1812      0.0166      0.0455      Uiso calc . 1.00 .
 H(2C)  0.2647      0.2278      0.1062      0.0455      Uiso calc . 1.00 .
 H(3)   0.3352      0.0141      0.3507      0.0577      Uiso calc . 1.00 .
 H(4)   0.2892      0.0569      0.4448      0.0577      Uiso calc . 1.00 .
 H(6C)  0.1846      0.1161      0.4029      0.0822      Uiso calc . 1.00 .
 H(6A)  0.2504      0.1580      0.4504      0.0822      Uiso calc . 1.00 .
 H(6B)  0.1736      0.1773      0.3525      0.0822      Uiso calc . 1.00 .
 H(12C) 0.1639      0.0748      -0.1509     0.1492      Uiso calc . 1.00 .
 H(12A) 0.2297      0.1165      -0.0804     0.1492      Uiso calc . 1.00 .
 H(12B) 0.2362      0.0626      -0.1340     0.1492      Uiso calc . 1.00 .
 H(13C) 0.0998      -0.0360     -0.0559     0.1788      Uiso calc . 1.00 .
 H(13A) 0.0925      0.0280      -0.0941     0.1788      Uiso calc . 1.00 .
 H(13B) 0.1095      -0.0218     -0.1428     0.1788      Uiso calc . 1.00 .
 H(14C) 0.2568      -0.0976     0.1979      0.1499      Uiso calc . 1.00 .
 H(14A) 0.1807      -0.0686     0.1373      0.1499      Uiso calc . 1.00 .
 H(14B) 0.1971      -0.1119     0.0786      0.1499      Uiso calc . 1.00 .
 H(15C) 0.3822      -0.0370     0.3078      0.1931      Uiso calc . 1.00 .
 H(15A) 0.3889      -0.0782     0.2361      0.1931      Uiso calc . 1.00 .
 H(15B) 0.4253      -0.0169     0.2668      0.1931      Uiso calc . 1.00 .
 H(16C) 0.3740      0.1013      0.0949      0.1495      Uiso calc . 1.00 .
 H(16A) 0.4219      0.0486      0.1644      0.1495      Uiso calc . 1.00 .
 H(16B) 0.3800      0.0469      0.0419      0.1495      Uiso calc . 1.00 .
 H(22C) 0.0581      0.1470      -0.1439     0.0973      Uiso calc . 1.00 .
 H(22A) 0.0529      0.2147      -0.1509     0.0973      Uiso calc . 1.00 .
 H(22B) 0.1284      0.1844      -0.0855     0.0973      Uiso calc . 1.00 .
 H(23C) 0.1119      0.3176      0.0512      0.0993      Uiso calc . 1.00 .
 H(23A) 0.1893      0.2926      0.1346      0.0993      Uiso calc . 1.00 .
 H(23B) 0.1515      0.2847      0.0139      0.0993      Uiso calc . 1.00 .
 H(24C) 0.0871      0.2428      0.2578      0.1208      Uiso calc . 1.00 .
 H(24A) 0.1530      0.2705      0.2700      0.1208      Uiso calc . 1.00 .
 H(24B) 0.0754      0.2946      0.1854      0.1208      Uiso calc . 1.00 .
 H(25C) 0.0552      0.1286      0.2262      0.1320      Uiso calc . 1.00 .
 H(25A) -0.0163     0.1623      0.1438      0.1320      Uiso calc . 1.00 .
 H(25B) -0.0040     0.1005      0.1166      0.1320      Uiso calc . 1.00 .
 H(26C) 0.0232      0.0552      -0.0053     0.1221      Uiso calc . 1.00 .
 H(26A) -0.0444     0.0946      -0.0801     0.1221      Uiso calc . 1.00 .
 H(26B) 0.0103      0.0838      -0.1046     0.1221      Uiso calc . 1.00 .
 H(32C) 0.5040      0.1786      0.3533      0.0837      Uiso calc . 1.00 .
 H(32A) 0.4388      0.1414      0.2639      0.0837      Uiso calc . 1.00 .
 H(32B) 0.4354      0.2091      0.2560      0.0837      Uiso calc . 1.00 .
 H(33C) 0.3093      0.2909      0.2662      0.0849      Uiso calc . 1.00 .
 H(33A) 0.3875      0.3129      0.3542      0.0849      Uiso calc . 1.00 .
 H(33B) 0.3705      0.2812      0.2545      0.0849      Uiso calc . 1.00 .
 H(34C) 0.3335      0.2361      0.5284      0.0948      Uiso calc . 1.00 .
 H(34A) 0.3629      0.2886      0.5024      0.0948      Uiso calc . 1.00 .
 H(34B) 0.2863      0.2634      0.4153      0.0948      Uiso calc . 1.00 .
 H(35C) 0.4619      0.1278      0.6429      0.1029      Uiso calc . 1.00 .
 H(35A) 0.3862      0.1515      0.6020      0.1029      Uiso calc . 1.00 .
 H(35B) 0.3928      0.0905      0.5655      0.1029      Uiso calc . 1.00 .
 H(36C) 0.5231      0.0870      0.5434      0.0977      Uiso calc . 1.00 .
 H(36A) 0.4544      0.0490      0.4671      0.0977      Uiso calc . 1.00 .
 H(36B) 0.4940      0.0779      0.4262      0.0977      Uiso calc . 1.00 .

loop_
_atom_site_aniso_label
_atom_site_aniso_U_11
_atom_site_aniso_U_22
_atom_site_aniso_U_33
_atom_site_aniso_U_12
_atom_site_aniso_U_13
_atom_site_aniso_U_23
 Ru(1)  0.0394(2)   0.0254(2)   0.0363(2)   -0.0011(2)
.0264(2)   -0.0014(2)
 Ru(2)  0.0348(2)   0.0372(2)   0.0375(2)   0.0056(2)   0.0250(2)
0.0061(2)
 Ru(3)  0.0369(2)   0.0286(2)   0.0287(2)   -0.0014(2)
.0214(2)   -0.0006(2)
 C(1)   0.032(2)    0.031(2)    0.027(2)    0.000(2)    0.017(2)    0.002(2)
 C(2)   0.048(3)    0.039(3)    0.037(2)    -0.004(2)   0.029(2)    0.004(2)
 C(3)   0.045(4)    0.022(3)    0.043(4)    -0.001(3)   0.023(3)    0.004(3)
 C(3A)  0.029(7)    0.036(7)    0.032(7)    0.001(6)
0.021(6)    -0.001(6)
 C(4A)  0.045(9)    0.030(8)    0.046(8)    0.004(6)    0.028(8)    0.014(6)
 C(4)   0.054(5)    0.033(4)    0.033(4)    -0.005(3)   0.031(4)    0.005(3)
 C(5)   0.065(3)    0.037(3)    0.051(3)    -0.005(2)   0.046(3)    0.001(2)
 C(6)   0.125(5)    0.068(4)    0.084(4)    -0.011(4)
.088(4)    -0.007(3)
 C(7)   0.101(5)    0.043(3)    0.049(3)    0.013(3)
0.054(3)    -0.001(2)
 C(8)   0.055(4)    0.077(4)    0.071(4)    -0.014(3)   0.037(3)    -0.046(3
)
 C(9)   0.159(7)    0.029(3)    0.103(5)    -0.016(4)
.111(5)    -0.017(3)
 C(10)  0.086(5)    0.071(4)    0.041(3)    0.047(4)
0.026(3)    -0.008(3)
 C(11)  0.059(3)    0.054(3)    0.085(4)    -0.021(3)
.057(3)    -0.038(3)
 C(12)  0.33(1)     0.114(6)    0.089(5)    0.097(7)    0.147(7)    0.037(4)
 C(13)  0.074(5)    0.26(1)     0.211(9)    -0.055(6)
.063(6)    -0.186(9)
 C(14)  0.57(2)     0.042(4)    0.36(1)     -0.072(8)
43(2)     -0.052(6)
 C(15)  0.23(1)     0.24(1)     0.060(5)    0.199(9)
0.022(6)    -0.012(6)
 C(16)  0.207(9)    0.174(8)    0.35(1)     -0.117(7)
25(1)     -0.173(9)
 C(17)  0.038(3)    0.056(3)    0.041(3)    0.018(2)    0.015(2)    0.010(2)
 C(18)  0.045(3)    0.040(3)    0.051(3)    0.014(2)    0.025(3)    0.010(2)
 C(19)  0.055(3)    0.068(4)    0.058(3)    0.027(3)    0.035(3)    0.004(3)
 C(20)  0.042(3)    0.086(4)    0.082(4)    0.023(3)    0.042(3)    0.026(4)
 C(21)  0.030(3)    0.057(3)    0.076(4)    0.006(3)
0.015(3)    -0.004(3)
 C(22)  0.080(4)    0.133(6)    0.034(3)    0.046(4)    0.019(3)    0.016(3)
 C(23)  0.080(4)    0.045(3)    0.104(5)    0.015(3)    0.039(4)    0.025(3)
 C(24)  0.123(6)    0.129(6)    0.084(5)    0.060(5)
0.058(5)    -0.011(4)
 C(25)  0.068(4)    0.189(8)    0.179(8)    0.028(5)    0.094(5)    0.072(6)
 C(26)  0.047(4)    0.075(5)    0.160(7)    -0.004(3)
.020(4)    -0.029(5)
 C(27)  0.033(2)    0.052(3)    0.037(3)    -0.013(2)
.017(2)    -0.011(2)
 C(28)  0.045(3)    0.035(3)    0.042(3)    -0.012(2)
.020(2)    -0.009(2)
 C(29)  0.055(3)    0.050(3)    0.044(3)    -0.012(2)
.028(3)    -0.021(2)
 C(30)  0.053(3)    0.066(4)    0.026(2)    -0.015(3)
.015(2)    -0.003(2)
 C(31)  0.035(3)    0.054(3)    0.036(3)    0.001(2)
0.007(2)    -0.002(2)
 C(32)  0.048(3)    0.109(5)    0.061(3)    -0.022(3)
.035(3)    -0.016(3)
 C(33)  0.086(4)    0.038(3)    0.082(4)    -0.016(3)
.040(4)    -0.002(3)
 C(34)  0.104(5)    0.082(4)    0.103(5)    -0.022(4)
.072(4)    -0.050(4)
 C(35)  0.102(5)    0.125(6)    0.031(3)    -0.018(4)   0.029(3)    0.010(3)
 C(36)  0.057(4)    0.080(4)    0.080(4)    0.022(3)    0.015(3)    0.016(4)
#---------------------------------------------------------------------------
_refine_special_details
;
 ?
;
_refine_ls_structure_factor_coef       F
_refine_ls_matrix_type                 full
_refine_ls_weighting_scheme            'w = 1/[\s^2^(Fo) + 0.00001|Fo|^2^]'
_refine_ls_hydrogen_treatment          noref
_refine_ls_extinction_method           none
_refine_ls_extinction_coef             ?
_refine_ls_abs_structure_details       ?
_refine_ls_abs_structure_Flack         ?
_refine_ls_number_reflns               4963
_refine_ls_number_parameters           371
_refine_ls_number_restraints           0
_refine_ls_number_constraints          0
_refine_ls_R_factor_all                ?
_refine_ls_R_factor_obs                0.0270
_refine_ls_wR_factor_all               ?
_refine_ls_wR_factor_obs               0.0280
_refine_ls_goodness_of_fit_all         ?
_refine_ls_goodness_of_fit_obs         3.000
_refine_ls_shift/esd_max               0.0680
_refine_ls_shift/esd_mean              0.0000
_refine_diff_density_min               -0.50
_refine_diff_density_max               0.60
#---------------------------------------------------------------------------
_geom_special_details
;
 ?
;
loop_
_geom_bond_atom_site_label_1
_geom_bond_atom_site_label_2
_geom_bond_distance
_geom_bond_site_symmetry_1
_geom_bond_site_symmetry_2
_geom_bond_publ_flag
 Ru(1)     Ru(2)     2.7943(6)  1_555 1_555 yes
 Ru(1)     Ru(3)     2.7718(6)  1_555 1_555 yes
 Ru(1)     C(1)      1.981(4)   1_555 1_555 yes
 Ru(1)     C(3)      1.991(6)   1_555 1_555 yes
 Ru(1)     C(3A)     1.98(1)    1_555 1_555 yes
 Ru(1)     C(7)      2.311(4)   1_555 1_555 yes
 Ru(1)     C(8)      2.250(5)   1_555 1_555 yes
 Ru(1)     C(9)      2.205(5)   1_555 1_555 yes
 Ru(1)     C(10)     2.214(5)   1_555 1_555 yes
 Ru(1)     C(11)     2.272(4)   1_555 1_555 yes
 Ru(2)     Ru(3)     2.7450(7)  1_555 1_555 yes
 Ru(2)     C(1)      2.026(4)   1_555 1_555 yes
 Ru(2)     C(3A)     2.24(1)    1_555 1_555 yes
 Ru(2)     C(4A)     2.23(1)    1_555 1_555 yes
 Ru(2)     C(5)      2.076(4)   1_555 1_555 yes
 Ru(2)     C(17)     2.248(4)   1_555 1_555 yes
 Ru(2)     C(18)     2.253(4)   1_555 1_555 yes
 Ru(2)     C(19)     2.256(4)   1_555 1_555 yes
 Ru(2)     C(20)     2.257(5)   1_555 1_555 yes
 Ru(2)     C(21)     2.221(4)   1_555 1_555 yes
 Ru(3)     C(1)      2.067(4)   1_555 1_555 yes
 Ru(3)     C(3)      2.196(6)   1_555 1_555 yes
 Ru(3)     C(4)      2.193(6)   1_555 1_555 yes
 Ru(3)     C(5)      2.156(4)   1_555 1_555 yes
 Ru(3)     C(27)     2.254(4)   1_555 1_555 yes
 Ru(3)     C(28)     2.253(4)   1_555 1_555 yes
 Ru(3)     C(29)     2.238(4)   1_555 1_555 yes
 Ru(3)     C(30)     2.238(4)   1_555 1_555 yes
 Ru(3)     C(31)     2.220(4)   1_555 1_555 yes
 C(1)      C(2)      1.490(5)   1_555 1_555 yes
 C(2)      H(2A)     0.958      1_555 1_555 no
 C(2)      H(2B)     0.949      1_555 1_555 no
 C(2)      H(2C)     0.969      1_555 1_555 no
 C(3)      C(4)      1.409(8)   1_555 1_555 yes
 C(3)      H(3)      1.123      1_555 1_555 no
 C(3A)     C(4A)     1.42(2)    1_555 1_555 yes
 C(4A)     C(4)      1.60(1)    1_555 1_555 yes
 C(4A)     C(5)      1.36(1)    1_555 1_555 yes
 C(4)      C(5)      1.336(7)   1_555 1_555 yes
 C(4)      H(4)      1.246      1_555 1_555 no
 C(5)      C(6)      1.519(6)   1_555 1_555 yes
 C(6)      H(6C)     0.949      1_555 1_555 no
 C(6)      H(6A)     0.961      1_555 1_555 no
 C(6)      H(6B)     0.963      1_555 1_555 no
 C(7)      C(8)      1.368(7)   1_555 1_555 yes
 C(7)      C(11)     1.372(7)   1_555 1_555 yes
 C(7)      C(12)     1.515(7)   1_555 1_555 yes
 C(8)      C(9)      1.381(8)   1_555 1_555 yes
 C(8)      C(13)     1.517(8)   1_555 1_555 yes
 C(9)      C(10)     1.405(8)   1_555 1_555 yes
 C(9)      C(14)     1.505(8)   1_555 1_555 yes
 C(10)     C(11)     1.420(7)   1_555 1_555 yes
 C(10)     C(15)     1.476(8)   1_555 1_555 yes
 C(11)     C(16)     1.495(7)   1_555 1_555 yes
 C(12)     H(12C)    0.969      1_555 1_555 no
 C(12)     H(12A)    0.964      1_555 1_555 no
 C(12)     H(12B)    0.951      1_555 1_555 no
 C(13)     H(13C)    0.945      1_555 1_555 no
 C(13)     H(13A)    0.980      1_555 1_555 no
 C(13)     H(13B)    0.960      1_555 1_555 no
 C(14)     H(14C)    0.893      1_555 1_555 no
 C(14)     H(14A)    1.017      1_555 1_555 no
 C(14)     H(14B)    1.005      1_555 1_555 no
 C(15)     H(15C)    0.957      1_555 1_555 no
 C(15)     H(15A)    0.956      1_555 1_555 no
 C(15)     H(15B)    0.986      1_555 1_555 no
 C(16)     H(16C)    0.951      1_555 1_555 no
 C(16)     H(16A)    0.993      1_555 1_555 no
 C(16)     H(16B)    0.952      1_555 1_555 no
 C(17)     C(18)     1.409(6)   1_555 1_555 yes
 C(17)     C(21)     1.416(7)   1_555 1_555 yes
 C(17)     C(22)     1.506(7)   1_555 1_555 yes
 C(18)     C(19)     1.423(6)   1_555 1_555 yes
 C(18)     C(23)     1.487(7)   1_555 1_555 yes
 C(19)     C(20)     1.412(7)   1_555 1_555 yes
 C(19)     C(24)     1.512(7)   1_555 1_555 yes
 C(20)     C(21)     1.419(7)   1_555 1_555 yes
 C(20)     C(25)     1.513(7)   1_555 1_555 yes
 C(21)     C(26)     1.496(7)   1_555 1_555 yes
 C(22)     H(22C)    0.962      1_555 1_555 no
 C(22)     H(22A)    0.956      1_555 1_555 no
 C(22)     H(22B)    0.951      1_555 1_555 no
 C(23)     H(23C)    0.953      1_555 1_555 no
 C(23)     H(23A)    0.949      1_555 1_555 no
 C(23)     H(23B)    0.965      1_555 1_555 no
 C(24)     H(24C)    0.986      1_555 1_555 no
 C(24)     H(24A)    0.954      1_555 1_555 no
 C(24)     H(24B)    0.940      1_555 1_555 no
 C(25)     H(25C)    0.967      1_555 1_555 no
 C(25)     H(25A)    0.937      1_555 1_555 no
 C(25)     H(25B)    0.976      1_555 1_555 no
 C(26)     H(26C)    0.974      1_555 1_555 no
 C(26)     H(26A)    0.959      1_555 1_555 no
 C(26)     H(26B)    0.955      1_555 1_555 no
 C(27)     C(28)     1.408(6)   1_555 1_555 yes
 C(27)     C(31)     1.423(6)   1_555 1_555 yes
 C(27)     C(32)     1.508(6)   1_555 1_555 yes
 C(28)     C(29)     1.426(6)   1_555 1_555 yes
 C(28)     C(33)     1.499(6)   1_555 1_555 yes
 C(29)     C(30)     1.419(6)   1_555 1_555 yes
 C(29)     C(34)     1.501(7)   1_555 1_555 yes
 C(30)     C(31)     1.415(6)   1_555 1_555 yes
 C(30)     C(35)     1.507(6)   1_555 1_555 yes
 C(31)     C(36)     1.492(7)   1_555 1_555 yes
 C(32)     H(32C)    0.950      1_555 1_555 no
 C(32)     H(32A)    0.961      1_555 1_555 no
 C(32)     H(32B)    0.959      1_555 1_555 no
 C(33)     H(33C)    0.959      1_555 1_555 no
 C(33)     H(33A)    0.948      1_555 1_555 no
 C(33)     H(33B)    0.974      1_555 1_555 no
 C(34)     H(34C)    0.971      1_555 1_555 no
 C(34)     H(34A)    0.946      1_555 1_555 no
 C(34)     H(34B)    0.963      1_555 1_555 no
 C(35)     H(35C)    0.945      1_555 1_555 no
 C(35)     H(35A)    0.955      1_555 1_555 no
 C(35)     H(35B)    0.978      1_555 1_555 no
 C(36)     H(36C)    0.955      1_555 1_555 no
 C(36)     H(36A)    0.959      1_555 1_555 no
 C(36)     H(36B)    0.958      1_555 1_555 no
#---------------------------------------------------------------------------
loop_
_geom_angle_atom_site_label_1
_geom_angle_atom_site_label_2
_geom_angle_atom_site_label_3
_geom_angle
_geom_angle_site_symmetry_1
_geom_angle_site_symmetry_2
_geom_angle_site_symmetry_3
_geom_angle_publ_flag
   Ru(2)     Ru(1)     Ru(3)     59.09(2)   1_555 1_555 1_555 yes
   Ru(2)     Ru(1)     C(1)      46.5(1)    1_555 1_555 1_555 yes
   Ru(2)     Ru(1)     C(3)      83.7(2)    1_555 1_555 1_555 yes
   Ru(2)     Ru(1)     C(3A)     52.7(3)    1_555 1_555 1_555 yes
   Ru(2)     Ru(1)     C(7)      122.6(1)   1_555 1_555 1_555 yes
   Ru(2)     Ru(1)     C(8)      118.4(1)   1_555 1_555 1_555 yes
   Ru(2)     Ru(1)     C(9)      138.9(2)   1_555 1_555 1_555 yes
   Ru(2)     Ru(1)     C(10)     174.7(2)   1_555 1_555 1_555 yes
   Ru(2)     Ru(1)     C(11)     148.0(2)   1_555 1_555 1_555 yes
   Ru(3)     Ru(1)     C(1)      48.1(1)    1_555 1_555 1_555 yes
   Ru(3)     Ru(1)     C(3)      51.8(2)    1_555 1_555 1_555 yes
   Ru(3)     Ru(1)     C(3A)     86.5(3)    1_555 1_555 1_555 yes
   Ru(3)     Ru(1)     C(7)      142.6(1)   1_555 1_555 1_555 yes
   Ru(3)     Ru(1)     C(8)      175.8(2)   1_555 1_555 1_555 yes
   Ru(3)     Ru(1)     C(9)      148.1(2)   1_555 1_555 1_555 yes
   Ru(3)     Ru(1)     C(10)     122.2(1)   1_555 1_555 1_555 yes
   Ru(3)     Ru(1)     C(11)     121.2(1)   1_555 1_555 1_555 yes
   C(1)      Ru(1)     C(3)      98.8(2)    1_555 1_555 1_555 yes
   C(1)      Ru(1)     C(3A)     98.8(4)    1_555 1_555 1_555 yes
   C(1)      Ru(1)     C(7)      102.9(2)   1_555 1_555 1_555 yes
   C(1)      Ru(1)     C(8)      127.7(2)   1_555 1_555 1_555 yes
   C(1)      Ru(1)     C(9)      162.3(2)   1_555 1_555 1_555 yes
   C(1)      Ru(1)     C(10)     138.7(2)   1_555 1_555 1_555 yes
   C(1)      Ru(1)     C(11)     107.0(2)   1_555 1_555 1_555 yes
   C(3)      Ru(1)     C(3A)     64.6(4)    1_555 1_555 1_555 yes
   C(3)      Ru(1)     C(7)      153.4(2)   1_555 1_555 1_555 yes
   C(3)      Ru(1)     C(8)      132.2(2)   1_555 1_555 1_555 yes
   C(3)      Ru(1)     C(9)      98.8(2)    1_555 1_555 1_555 yes
   C(3)      Ru(1)     C(10)     93.4(2)    1_555 1_555 1_555 yes
   C(3)      Ru(1)     C(11)     123.0(2)   1_555 1_555 1_555 yes
   C(3A)     Ru(1)     C(7)      125.8(4)   1_555 1_555 1_555 yes
   C(3A)     Ru(1)     C(8)      94.3(4)    1_555 1_555 1_555 yes
   C(3A)     Ru(1)     C(9)      91.1(4)    1_555 1_555 1_555 yes
   C(3A)     Ru(1)     C(10)     121.9(4)   1_555 1_555 1_555 yes
   C(3A)     Ru(1)     C(11)     150.6(4)   1_555 1_555 1_555 yes
   C(7)      Ru(1)     C(8)      34.9(2)    1_555 1_555 1_555 yes
   C(7)      Ru(1)     C(9)      59.5(2)    1_555 1_555 1_555 yes
   C(7)      Ru(1)     C(10)     60.1(2)    1_555 1_555 1_555 yes
   C(7)      Ru(1)     C(11)     34.8(2)    1_555 1_555 1_555 yes
   C(8)      Ru(1)     C(9)      36.1(2)    1_555 1_555 1_555 yes
   C(8)      Ru(1)     C(10)     60.6(2)    1_555 1_555 1_555 yes
   C(8)      Ru(1)     C(11)     58.8(2)    1_555 1_555 1_555 yes
   C(9)      Ru(1)     C(10)     37.1(2)    1_555 1_555 1_555 yes
   C(9)      Ru(1)     C(11)     60.4(2)    1_555 1_555 1_555 yes
   C(10)     Ru(1)     C(11)     36.9(2)    1_555 1_555 1_555 yes
   Ru(1)     Ru(2)     Ru(3)     60.04(2)   1_555 1_555 1_555 yes
   Ru(1)     Ru(2)     C(1)      45.1(1)    1_555 1_555 1_555 yes
   Ru(1)     Ru(2)     C(3A)     44.7(3)    1_555 1_555 1_555 yes
   Ru(1)     Ru(2)     C(4A)     72.9(3)    1_555 1_555 1_555 yes
   Ru(1)     Ru(2)     C(5)      84.6(1)    1_555 1_555 1_555 yes
   Ru(1)     Ru(2)     C(17)     112.4(1)   1_555 1_555 1_555 yes
   Ru(1)     Ru(2)     C(18)     136.3(1)   1_555 1_555 1_555 yes
   Ru(1)     Ru(2)     C(19)     172.8(1)   1_555 1_555 1_555 yes
   Ru(1)     Ru(2)     C(20)     144.4(2)   1_555 1_555 1_555 yes
   Ru(1)     Ru(2)     C(21)     115.2(1)   1_555 1_555 1_555 yes
   Ru(3)     Ru(2)     C(1)      48.5(1)    1_555 1_555 1_555 yes
   Ru(3)     Ru(2)     C(3A)     82.4(3)    1_555 1_555 1_555 yes
   Ru(3)     Ru(2)     C(4A)     75.4(3)    1_555 1_555 1_555 yes
   Ru(3)     Ru(2)     C(5)      50.8(1)    1_555 1_555 1_555 yes
   Ru(3)     Ru(2)     C(17)     142.7(1)   1_555 1_555 1_555 yes
   Ru(3)     Ru(2)     C(18)     121.0(1)   1_555 1_555 1_555 yes
   Ru(3)     Ru(2)     C(19)     123.2(1)   1_555 1_555 1_555 yes
   Ru(3)     Ru(2)     C(20)     147.4(2)   1_555 1_555 1_555 yes
   Ru(3)     Ru(2)     C(21)     175.2(1)   1_555 1_555 1_555 yes
   C(1)      Ru(2)     C(3A)     89.4(3)    1_555 1_555 1_555 yes
   C(1)      Ru(2)     C(4A)     109.2(4)   1_555 1_555 1_555 yes
   C(1)      Ru(2)     C(5)      98.1(2)    1_555 1_555 1_555 yes
   C(1)      Ru(2)     C(17)     98.5(2)    1_555 1_555 1_555 yes
   C(1)      Ru(2)     C(18)     99.5(2)    1_555 1_555 1_555 yes
   C(1)      Ru(2)     C(19)     130.9(2)   1_555 1_555 1_555 yes
   C(1)      Ru(2)     C(20)     158.9(2)   1_555 1_555 1_555 yes
   C(1)      Ru(2)     C(21)     128.3(2)   1_555 1_555 1_555 yes
   C(3A)     Ru(2)     C(4A)     37.1(4)    1_555 1_555 1_555 yes
   C(3A)     Ru(2)     C(5)      68.2(3)    1_555 1_555 1_555 yes
   C(3A)     Ru(2)     C(17)     119.1(3)   1_555 1_555 1_555 yes
   C(3A)     Ru(2)     C(18)     154.8(3)   1_555 1_555 1_555 yes
   C(3A)     Ru(2)     C(19)     139.6(3)   1_555 1_555 1_555 yes
   C(3A)     Ru(2)     C(20)     104.9(3)   1_555 1_555 1_555 yes
   C(3A)     Ru(2)     C(21)     94.3(3)    1_555 1_555 1_555 yes
   C(4A)     Ru(2)     C(5)      36.5(4)    1_555 1_555 1_555 yes
   C(4A)     Ru(2)     C(17)     140.5(4)   1_555 1_555 1_555 yes
   C(4A)     Ru(2)     C(18)     150.2(4)   1_555 1_555 1_555 yes
   C(4A)     Ru(2)     C(19)     113.8(4)   1_555 1_555 1_555 yes
   C(4A)     Ru(2)     C(20)     91.3(4)    1_555 1_555 1_555 yes
   C(4A)     Ru(2)     C(21)     104.1(4)   1_555 1_555 1_555 yes
   C(5)      Ru(2)     C(17)     161.9(2)   1_555 1_555 1_555 yes
   C(5)      Ru(2)     C(18)     132.6(2)   1_555 1_555 1_555 yes
   C(5)      Ru(2)     C(19)     102.3(2)   1_555 1_555 1_555 yes
   C(5)      Ru(2)     C(20)     101.6(2)   1_555 1_555 1_555 yes
   C(5)      Ru(2)     C(21)     131.0(2)   1_555 1_555 1_555 yes
   C(17)     Ru(2)     C(18)     36.5(2)    1_555 1_555 1_555 yes
   C(17)     Ru(2)     C(19)     60.9(2)    1_555 1_555 1_555 yes
   C(17)     Ru(2)     C(20)     61.0(2)    1_555 1_555 1_555 yes
   C(17)     Ru(2)     C(21)     36.9(2)    1_555 1_555 1_555 yes
   C(18)     Ru(2)     C(19)     36.8(2)    1_555 1_555 1_555 yes
   C(18)     Ru(2)     C(20)     61.2(2)    1_555 1_555 1_555 yes
   C(18)     Ru(2)     C(21)     61.7(2)    1_555 1_555 1_555 yes
   C(19)     Ru(2)     C(20)     36.5(2)    1_555 1_555 1_555 yes
   C(19)     Ru(2)     C(21)     61.5(2)    1_555 1_555 1_555 yes
   C(20)     Ru(2)     C(21)     36.9(2)    1_555 1_555 1_555 yes
   Ru(1)     Ru(3)     Ru(2)     60.86(1)   1_555 1_555 1_555 yes
   Ru(1)     Ru(3)     C(1)      45.5(1)    1_555 1_555 1_555 yes
   Ru(1)     Ru(3)     C(3)      45.4(2)    1_555 1_555 1_555 yes
   Ru(1)     Ru(3)     C(4)      74.8(2)    1_555 1_555 1_555 yes
   Ru(1)     Ru(3)     C(5)      83.8(1)    1_555 1_555 1_555 yes
   Ru(1)     Ru(3)     C(27)     112.7(1)   1_555 1_555 1_555 yes
   Ru(1)     Ru(3)     C(28)     135.7(1)   1_555 1_555 1_555 yes
   Ru(1)     Ru(3)     C(29)     172.7(1)   1_555 1_555 1_555 yes
   Ru(1)     Ru(3)     C(30)     145.7(1)   1_555 1_555 1_555 yes
   Ru(1)     Ru(3)     C(31)     116.4(1)   1_555 1_555 1_555 yes
   Ru(2)     Ru(3)     C(1)      47.3(1)    1_555 1_555 1_555 yes
   Ru(2)     Ru(3)     C(3)      81.4(2)    1_555 1_555 1_555 yes
   Ru(2)     Ru(3)     C(4)      74.5(2)    1_555 1_555 1_555 yes
   Ru(2)     Ru(3)     C(5)      48.3(1)    1_555 1_555 1_555 yes
   Ru(2)     Ru(3)     C(27)     140.7(1)   1_555 1_555 1_555 yes
   Ru(2)     Ru(3)     C(28)     118.3(1)   1_555 1_555 1_555 yes
   Ru(2)     Ru(3)     C(29)     120.4(1)   1_555 1_555 1_555 yes
   Ru(2)     Ru(3)     C(30)     146.5(1)   1_555 1_555 1_555 yes
   Ru(2)     Ru(3)     C(31)     176.4(1)   1_555 1_555 1_555 yes
   C(1)      Ru(3)     C(3)      90.0(2)    1_555 1_555 1_555 yes
   C(1)      Ru(3)     C(4)      108.9(2)   1_555 1_555 1_555 yes
   C(1)      Ru(3)     C(5)      94.4(2)    1_555 1_555 1_555 yes
   C(1)      Ru(3)     C(27)     98.6(2)    1_555 1_555 1_555 yes
   C(1)      Ru(3)     C(28)     98.5(2)    1_555 1_555 1_555 yes
   C(1)      Ru(3)     C(29)     129.1(2)   1_555 1_555 1_555 yes
   C(1)      Ru(3)     C(30)     158.8(2)   1_555 1_555 1_555 yes
   C(1)      Ru(3)     C(31)     129.3(2)   1_555 1_555 1_555 yes
   C(3)      Ru(3)     C(4)      37.5(2)    1_555 1_555 1_555 yes
   C(3)      Ru(3)     C(5)      66.5(2)    1_555 1_555 1_555 yes
   C(3)      Ru(3)     C(27)     123.5(2)   1_555 1_555 1_555 yes
   C(3)      Ru(3)     C(28)     159.0(2)   1_555 1_555 1_555 yes
   C(3)      Ru(3)     C(29)     140.7(2)   1_555 1_555 1_555 yes
   C(3)      Ru(3)     C(30)     106.7(2)   1_555 1_555 1_555 yes
   C(3)      Ru(3)     C(31)     98.1(2)    1_555 1_555 1_555 yes
   C(4)      Ru(3)     C(5)      35.8(2)    1_555 1_555 1_555 yes
   C(4)      Ru(3)     C(27)     144.2(2)   1_555 1_555 1_555 yes
   C(4)      Ru(3)     C(28)     149.5(2)   1_555 1_555 1_555 yes
   C(4)      Ru(3)     C(29)     112.5(2)   1_555 1_555 1_555 yes
   C(4)      Ru(3)     C(30)     92.2(2)    1_555 1_555 1_555 yes
   C(4)      Ru(3)     C(31)     107.4(2)   1_555 1_555 1_555 yes
   C(5)      Ru(3)     C(27)     163.4(2)   1_555 1_555 1_555 yes
   C(5)      Ru(3)     C(28)     131.3(2)   1_555 1_555 1_555 yes
   C(5)      Ru(3)     C(29)     102.3(2)   1_555 1_555 1_555 yes
   C(5)      Ru(3)     C(30)     104.2(2)   1_555 1_555 1_555 yes
   C(5)      Ru(3)     C(31)     134.7(2)   1_555 1_555 1_555 yes
   C(27)     Ru(3)     C(28)     36.4(2)    1_555 1_555 1_555 yes
   C(27)     Ru(3)     C(29)     61.4(2)    1_555 1_555 1_555 yes
   C(27)     Ru(3)     C(30)     61.3(2)    1_555 1_555 1_555 yes
   C(27)     Ru(3)     C(31)     37.1(2)    1_555 1_555 1_555 yes
   C(28)     Ru(3)     C(29)     37.0(2)    1_555 1_555 1_555 yes
   C(28)     Ru(3)     C(30)     61.5(2)    1_555 1_555 1_555 yes
   C(28)     Ru(3)     C(31)     61.7(2)    1_555 1_555 1_555 yes
   C(29)     Ru(3)     C(30)     37.0(2)    1_555 1_555 1_555 yes
   C(29)     Ru(3)     C(31)     62.1(2)    1_555 1_555 1_555 yes
   C(30)     Ru(3)     C(31)     37.0(2)    1_555 1_555 1_555 yes
   Ru(1)     C(1)      Ru(2)     88.4(1)    1_555 1_555 1_555 yes
   Ru(1)     C(1)      Ru(3)     86.4(1)    1_555 1_555 1_555 yes
   Ru(1)     C(1)      C(2)      126.6(3)   1_555 1_555 1_555 yes
   Ru(2)     C(1)      Ru(3)     84.2(1)    1_555 1_555 1_555 yes
   Ru(2)     C(1)      C(2)      129.1(3)   1_555 1_555 1_555 yes
   Ru(3)     C(1)      C(2)      127.7(3)   1_555 1_555 1_555 yes
   C(1)      C(2)      H(2A)     111.0(4)   1_555 1_555 1_555 no
   C(1)      C(2)      H(2B)     111.0(4)   1_555 1_555 1_555 no
   C(1)      C(2)      H(2C)     110.5(4)   1_555 1_555 1_555 no
   H(2A)     C(2)      H(2B)     108.9(4)   1_555 1_555 1_555 no
   H(2A)     C(2)      H(2C)     107.3(4)   1_555 1_555 1_555 no
   H(2B)     C(2)      H(2C)     108.0(4)   1_555 1_555 1_555 no
   Ru(1)     C(3)      Ru(3)     82.8(2)    1_555 1_555 1_555 yes
   Ru(1)     C(3)      C(4)      126.6(5)   1_555 1_555 1_555 yes
   Ru(1)     C(3)      H(3)      120.4(4)   1_555 1_555 1_555 no
   Ru(3)     C(3)      C(4)      71.2(3)    1_555 1_555 1_555 yes
   Ru(3)     C(3)      H(3)      120.7(4)   1_555 1_555 1_555 no
   C(4)      C(3)      H(3)      112.9(5)   1_555 1_555 1_555 no
   Ru(1)     C(3A)     Ru(2)     82.6(4)    1_555 1_555 1_555 yes
   Ru(1)     C(3A)     C(4A)     124.2(9)   1_555 1_555 1_555 yes
   Ru(2)     C(3A)     C(4A)     70.8(7)    1_555 1_555 1_555 yes
   Ru(2)     C(4A)     C(3A)     72.1(7)    1_555 1_555 1_555 yes
   Ru(2)     C(4A)     C(4)      103.1(7)   1_555 1_555 1_555 yes
   Ru(2)     C(4A)     C(5)      65.7(5)    1_555 1_555 1_555 yes
   C(3A)     C(4A)     C(4)      103.6(10)  1_555 1_555 1_555 yes
   C(3A)     C(4A)     C(5)      121(1)     1_555 1_555 1_555 yes
   C(4)      C(4A)     C(5)      53.0(6)    1_555 1_555 1_555 yes
   Ru(3)     C(4)      C(3)      71.4(3)    1_555 1_555 1_555 yes
   Ru(3)     C(4)      C(4A)     106.9(5)   1_555 1_555 1_555 yes
   Ru(3)     C(4)      C(5)      70.6(3)    1_555 1_555 1_555 yes
   Ru(3)     C(4)      H(4)      125.2(4)   1_555 1_555 1_555 no
   C(3)      C(4)      C(4A)     97.7(7)    1_555 1_555 1_555 yes
   C(3)      C(4)      C(5)      120.7(5)   1_555 1_555 1_555 yes
   C(3)      C(4)      H(4)      121.0(6)   1_555 1_555 1_555 no
   C(4A)     C(4)      C(5)      54.1(5)    1_555 1_555 1_555 yes
   C(4A)     C(4)      H(4)      121.6(6)   1_555 1_555 1_555 no
   C(5)      C(4)      H(4)      117.9(5)   1_555 1_555 1_555 no
   Ru(2)     C(5)      Ru(3)     80.8(1)    1_555 1_555 1_555 yes
   Ru(2)     C(5)      C(4A)     77.7(6)    1_555 1_555 1_555 yes
   Ru(2)     C(5)      C(4)      123.0(4)   1_555 1_555 1_555 yes
   Ru(2)     C(5)      C(6)      123.6(4)   1_555 1_555 1_555 yes
   Ru(3)     C(5)      C(4A)     119.9(6)   1_555 1_555 1_555 yes
   Ru(3)     C(5)      C(4)      73.6(3)    1_555 1_555 1_555 yes
   Ru(3)     C(5)      C(6)      124.6(3)   1_555 1_555 1_555 yes
   C(4A)     C(5)      C(4)      72.9(6)    1_555 1_555 1_555 yes
   C(4A)     C(5)      C(6)      114.0(7)   1_555 1_555 1_555 yes
   C(4)      C(5)      C(6)      112.8(5)   1_555 1_555 1_555 yes
   C(5)      C(6)      H(6C)     111.2(5)   1_555 1_555 1_555 no
   C(5)      C(6)      H(6A)     110.5(5)   1_555 1_555 1_555 no
   C(5)      C(6)      H(6B)     110.4(4)   1_555 1_555 1_555 no
   H(6C)     C(6)      H(6A)     108.6(5)   1_555 1_555 1_555 no
   H(6C)     C(6)      H(6B)     108.4(6)   1_555 1_555 1_555 no
   H(6A)     C(6)      H(6B)     107.5(5)   1_555 1_555 1_555 no
   Ru(1)     C(7)      C(8)      70.1(3)    1_555 1_555 1_555 yes
   Ru(1)     C(7)      C(11)     71.0(3)    1_555 1_555 1_555 yes
   Ru(1)     C(7)      C(12)     131.9(4)   1_555 1_555 1_555 yes
   C(8)      C(7)      C(11)     108.3(5)   1_555 1_555 1_555 yes
   C(8)      C(7)      C(12)     126.4(7)   1_555 1_555 1_555 yes
   C(11)     C(7)      C(12)     124.6(7)   1_555 1_555 1_555 yes
   Ru(1)     C(8)      C(7)      75.0(3)    1_555 1_555 1_555 yes
   Ru(1)     C(8)      C(9)      70.2(3)    1_555 1_555 1_555 yes
   Ru(1)     C(8)      C(13)     127.5(4)   1_555 1_555 1_555 yes
   C(7)      C(8)      C(9)      109.3(5)   1_555 1_555 1_555 yes
   C(7)      C(8)      C(13)     125.0(7)   1_555 1_555 1_555 yes
   C(9)      C(8)      C(13)     125.2(8)   1_555 1_555 1_555 yes
   Ru(1)     C(9)      C(8)      73.7(3)    1_555 1_555 1_555 yes
   Ru(1)     C(9)      C(10)     71.8(3)    1_555 1_555 1_555 yes
   Ru(1)     C(9)      C(14)     124.3(4)   1_555 1_555 1_555 yes
   C(8)      C(9)      C(10)     108.0(5)   1_555 1_555 1_555 yes
   C(8)      C(9)      C(14)     126.8(9)   1_555 1_555 1_555 yes
   C(10)     C(9)      C(14)     125.0(9)   1_555 1_555 1_555 yes
   Ru(1)     C(10)     C(9)      71.1(3)    1_555 1_555 1_555 yes
   Ru(1)     C(10)     C(11)     73.8(3)    1_555 1_555 1_555 yes
   Ru(1)     C(10)     C(15)     125.5(4)   1_555 1_555 1_555 yes
   C(9)      C(10)     C(11)     105.9(5)   1_555 1_555 1_555 yes
   C(9)      C(10)     C(15)     125.7(8)   1_555 1_555 1_555 yes
   C(11)     C(10)     C(15)     128.0(8)   1_555 1_555 1_555 yes
   Ru(1)     C(11)     C(7)      74.1(3)    1_555 1_555 1_555 yes
   Ru(1)     C(11)     C(10)     69.4(3)    1_555 1_555 1_555 yes
   Ru(1)     C(11)     C(16)     130.7(4)   1_555 1_555 1_555 yes
   C(7)      C(11)     C(10)     108.6(5)   1_555 1_555 1_555 yes
   C(7)      C(11)     C(16)     124.0(7)   1_555 1_555 1_555 yes
   C(10)     C(11)     C(16)     126.5(7)   1_555 1_555 1_555 yes
   C(7)      C(12)     H(12C)    110.5(8)   1_555 1_555 1_555 no
   C(7)      C(12)     H(12A)    111.0(6)   1_555 1_555 1_555 no
   C(7)      C(12)     H(12B)    112.3(6)   1_555 1_555 1_555 no
   H(12C)    C(12)     H(12A)    106.8(7)   1_555 1_555 1_555 no
   H(12C)    C(12)     H(12B)    107.8(7)   1_555 1_555 1_555 no
   H(12A)    C(12)     H(12B)    108.2(9)   1_555 1_555 1_555 no
   C(8)      C(13)     H(13C)    112.8(9)   1_555 1_555 1_555 no
   C(8)      C(13)     H(13A)    110.0(6)   1_555 1_555 1_555 no
   C(8)      C(13)     H(13B)    111.1(7)   1_555 1_555 1_555 no
   H(13C)    C(13)     H(13A)    107.4(7)   1_555 1_555 1_555 no
   H(13C)    C(13)     H(13B)    109.1(7)   1_555 1_555 1_555 no
   H(13A)    C(13)     H(13B)    106(1)     1_555 1_555 1_555 no
   C(9)      C(14)     H(14C)    117(1)     1_555 1_555 1_555 no
   C(9)      C(14)     H(14A)    110.1(7)   1_555 1_555 1_555 no
   C(9)      C(14)     H(14B)    110.2(7)   1_555 1_555 1_555 no
   H(14C)    C(14)     H(14A)    108.4(7)   1_555 1_555 1_555 no
   H(14C)    C(14)     H(14B)    109.4(7)   1_555 1_555 1_555 no
   H(14A)    C(14)     H(14B)    100(1)     1_555 1_555 1_555 no
   C(10)     C(15)     H(15C)    113.4(7)   1_555 1_555 1_555 no
   C(10)     C(15)     H(15A)    113.0(7)   1_555 1_555 1_555 no
   C(10)     C(15)     H(15B)    109.6(9)   1_555 1_555 1_555 no
   H(15C)    C(15)     H(15A)    108(1)     1_555 1_555 1_555 no
   H(15C)    C(15)     H(15B)    106.0(8)   1_555 1_555 1_555 no
   H(15A)    C(15)     H(15B)    106.0(8)   1_555 1_555 1_555 no
   C(11)     C(16)     H(16C)    112.5(6)   1_555 1_555 1_555 no
   C(11)     C(16)     H(16A)    110.1(8)   1_555 1_555 1_555 no
   C(11)     C(16)     H(16B)    113.0(7)   1_555 1_555 1_555 no
   H(16C)    C(16)     H(16A)    105.8(7)   1_555 1_555 1_555 no
   H(16C)    C(16)     H(16B)    109.3(10)  1_555 1_555 1_555 no
   H(16A)    C(16)     H(16B)    105.8(7)   1_555 1_555 1_555 no
   Ru(2)     C(17)     C(18)     71.9(3)    1_555 1_555 1_555 yes
   Ru(2)     C(17)     C(21)     70.5(3)    1_555 1_555 1_555 yes
   Ru(2)     C(17)     C(22)     128.6(3)   1_555 1_555 1_555 yes
   C(18)     C(17)     C(21)     108.6(5)   1_555 1_555 1_555 yes
   C(18)     C(17)     C(22)     126.2(5)   1_555 1_555 1_555 yes
   C(21)     C(17)     C(22)     124.9(5)   1_555 1_555 1_555 yes
   Ru(2)     C(18)     C(17)     71.6(3)    1_555 1_555 1_555 yes
   Ru(2)     C(18)     C(19)     71.8(3)    1_555 1_555 1_555 yes
   Ru(2)     C(18)     C(23)     130.3(3)   1_555 1_555 1_555 yes
   C(17)     C(18)     C(19)     107.5(4)   1_555 1_555 1_555 yes
   C(17)     C(18)     C(23)     127.6(5)   1_555 1_555 1_555 yes
   C(19)     C(18)     C(23)     124.0(5)   1_555 1_555 1_555 yes
   Ru(2)     C(19)     C(18)     71.5(3)    1_555 1_555 1_555 yes
   Ru(2)     C(19)     C(20)     71.8(3)    1_555 1_555 1_555 yes
   Ru(2)     C(19)     C(24)     131.9(4)   1_555 1_555 1_555 yes
   C(18)     C(19)     C(20)     108.2(5)   1_555 1_555 1_555 yes
   C(18)     C(19)     C(24)     123.7(6)   1_555 1_555 1_555 yes
   C(20)     C(19)     C(24)     126.9(6)   1_555 1_555 1_555 yes
   Ru(2)     C(20)     C(19)     71.7(3)    1_555 1_555 1_555 yes
   Ru(2)     C(20)     C(21)     70.2(3)    1_555 1_555 1_555 yes
   Ru(2)     C(20)     C(25)     127.1(4)   1_555 1_555 1_555 yes
   C(19)     C(20)     C(21)     108.0(5)   1_555 1_555 1_555 yes
   C(19)     C(20)     C(25)     125.7(6)   1_555 1_555 1_555 yes
   C(21)     C(20)     C(25)     126.2(6)   1_555 1_555 1_555 yes
   Ru(2)     C(21)     C(17)     72.5(3)    1_555 1_555 1_555 yes
   Ru(2)     C(21)     C(20)     72.9(3)    1_555 1_555 1_555 yes
   Ru(2)     C(21)     C(26)     127.1(4)   1_555 1_555 1_555 yes
   C(17)     C(21)     C(20)     107.6(5)   1_555 1_555 1_555 yes
   C(17)     C(21)     C(26)     126.5(6)   1_555 1_555 1_555 yes
   C(20)     C(21)     C(26)     125.3(6)   1_555 1_555 1_555 yes
   C(17)     C(22)     H(22C)    110.1(6)   1_555 1_555 1_555 no
   C(17)     C(22)     H(22A)    110.7(5)   1_555 1_555 1_555 no
   C(17)     C(22)     H(22B)    110.7(5)   1_555 1_555 1_555 no
   H(22C)    C(22)     H(22A)    108.0(5)   1_555 1_555 1_555 no
   H(22C)    C(22)     H(22B)    108.4(6)   1_555 1_555 1_555 no
   H(22A)    C(22)     H(22B)    108.9(7)   1_555 1_555 1_555 no
   C(18)     C(23)     H(23C)    110.8(5)   1_555 1_555 1_555 no
   C(18)     C(23)     H(23A)    110.4(5)   1_555 1_555 1_555 no
   C(18)     C(23)     H(23B)    109.9(5)   1_555 1_555 1_555 no
   H(23C)    C(23)     H(23A)    109.3(6)   1_555 1_555 1_555 no
   H(23C)    C(23)     H(23B)    108.0(5)   1_555 1_555 1_555 no
   H(23A)    C(23)     H(23B)    108.3(6)   1_555 1_555 1_555 no
   C(19)     C(24)     H(24C)    110.0(7)   1_555 1_555 1_555 no
   C(19)     C(24)     H(24A)    110.8(5)   1_555 1_555 1_555 no
   C(19)     C(24)     H(24B)    112.4(6)   1_555 1_555 1_555 no
   H(24C)    C(24)     H(24A)    106.2(6)   1_555 1_555 1_555 no
   H(24C)    C(24)     H(24B)    107.3(6)   1_555 1_555 1_555 no
   H(24A)    C(24)     H(24B)    110.0(8)   1_555 1_555 1_555 no
   C(20)     C(25)     H(25C)    110.6(5)   1_555 1_555 1_555 no
   C(20)     C(25)     H(25A)    112.3(7)   1_555 1_555 1_555 no
   C(20)     C(25)     H(25B)    110.3(7)   1_555 1_555 1_555 no
   H(25C)    C(25)     H(25A)    109.1(8)   1_555 1_555 1_555 no
   H(25C)    C(25)     H(25B)    106.0(7)   1_555 1_555 1_555 no
   H(25A)    C(25)     H(25B)    108.3(6)   1_555 1_555 1_555 no
   C(21)     C(26)     H(26C)    111.0(6)   1_555 1_555 1_555 no
   C(21)     C(26)     H(26A)    112.0(6)   1_555 1_555 1_555 no
   C(21)     C(26)     H(26B)    111.4(6)   1_555 1_555 1_555 no
   H(26C)    C(26)     H(26A)    106.8(7)   1_555 1_555 1_555 no
   H(26C)    C(26)     H(26B)    107.1(6)   1_555 1_555 1_555 no
   H(26A)    C(26)     H(26B)    108.4(7)   1_555 1_555 1_555 no
   Ru(3)     C(27)     C(28)     71.8(2)    1_555 1_555 1_555 yes
   Ru(3)     C(27)     C(31)     70.1(2)    1_555 1_555 1_555 yes
   Ru(3)     C(27)     C(32)     130.3(3)   1_555 1_555 1_555 yes
   C(28)     C(27)     C(31)     108.3(4)   1_555 1_555 1_555 yes
   C(28)     C(27)     C(32)     127.1(5)   1_555 1_555 1_555 yes
   C(31)     C(27)     C(32)     124.1(5)   1_555 1_555 1_555 yes
   Ru(3)     C(28)     C(27)     71.8(2)    1_555 1_555 1_555 yes
   Ru(3)     C(28)     C(29)     70.9(2)    1_555 1_555 1_555 yes
   Ru(3)     C(28)     C(33)     131.6(3)   1_555 1_555 1_555 yes
   C(27)     C(28)     C(29)     108.1(4)   1_555 1_555 1_555 yes
   C(27)     C(28)     C(33)     127.1(5)   1_555 1_555 1_555 yes
   C(29)     C(28)     C(33)     123.8(5)   1_555 1_555 1_555 yes
   Ru(3)     C(29)     C(28)     72.0(2)    1_555 1_555 1_555 yes
   Ru(3)     C(29)     C(30)     71.5(3)    1_555 1_555 1_555 yes
   Ru(3)     C(29)     C(34)     130.1(4)   1_555 1_555 1_555 yes
   C(28)     C(29)     C(30)     107.5(4)   1_555 1_555 1_555 yes
   C(28)     C(29)     C(34)     124.2(5)   1_555 1_555 1_555 yes
   C(30)     C(29)     C(34)     127.4(5)   1_555 1_555 1_555 yes
   Ru(3)     C(30)     C(29)     71.5(2)    1_555 1_555 1_555 yes
   Ru(3)     C(30)     C(31)     70.8(2)    1_555 1_555 1_555 yes
   Ru(3)     C(30)     C(35)     127.5(4)   1_555 1_555 1_555 yes
   C(29)     C(30)     C(31)     108.3(4)   1_555 1_555 1_555 yes
   C(29)     C(30)     C(35)     126.0(5)   1_555 1_555 1_555 yes
   C(31)     C(30)     C(35)     125.5(5)   1_555 1_555 1_555 yes
   Ru(3)     C(31)     C(27)     72.8(2)    1_555 1_555 1_555 yes
   Ru(3)     C(31)     C(30)     72.2(3)    1_555 1_555 1_555 yes
   Ru(3)     C(31)     C(36)     127.0(4)   1_555 1_555 1_555 yes
   C(27)     C(31)     C(30)     107.7(4)   1_555 1_555 1_555 yes
   C(27)     C(31)     C(36)     126.0(5)   1_555 1_555 1_555 yes
   C(30)     C(31)     C(36)     125.9(5)   1_555 1_555 1_555 yes
   C(27)     C(32)     H(32C)    111.2(4)   1_555 1_555 1_555 no
   C(27)     C(32)     H(32A)    110.0(4)   1_555 1_555 1_555 no
   C(27)     C(32)     H(32B)    110.4(5)   1_555 1_555 1_555 no
   H(32C)    C(32)     H(32A)    108.5(6)   1_555 1_555 1_555 no
   H(32C)    C(32)     H(32B)    108.7(5)   1_555 1_555 1_555 no
   H(32A)    C(32)     H(32B)    107.8(5)   1_555 1_555 1_555 no
   C(28)     C(33)     H(33C)    111.1(5)   1_555 1_555 1_555 no
   C(28)     C(33)     H(33A)    111.8(5)   1_555 1_555 1_555 no
   C(28)     C(33)     H(33B)    110.5(5)   1_555 1_555 1_555 no
   H(33C)    C(33)     H(33A)    108.9(5)   1_555 1_555 1_555 no
   H(33C)    C(33)     H(33B)    106.7(5)   1_555 1_555 1_555 no
   H(33A)    C(33)     H(33B)    107.7(5)   1_555 1_555 1_555 no
   C(29)     C(34)     H(34C)    110.5(6)   1_555 1_555 1_555 no
   C(29)     C(34)     H(34A)    112.2(5)   1_555 1_555 1_555 no
   C(29)     C(34)     H(34B)    110.5(5)   1_555 1_555 1_555 no
   H(34C)    C(34)     H(34A)    108.1(5)   1_555 1_555 1_555 no
   H(34C)    C(34)     H(34B)    106.6(6)   1_555 1_555 1_555 no
   H(34A)    C(34)     H(34B)    108.7(6)   1_555 1_555 1_555 no
   C(30)     C(35)     H(35C)    112.1(5)   1_555 1_555 1_555 no
   C(30)     C(35)     H(35A)    111.0(5)   1_555 1_555 1_555 no
   C(30)     C(35)     H(35B)    109.7(5)   1_555 1_555 1_555 no
   H(35C)    C(35)     H(35A)    109.5(5)   1_555 1_555 1_555 no
   H(35C)    C(35)     H(35B)    107.5(6)   1_555 1_555 1_555 no
   H(35A)    C(35)     H(35B)    106.8(6)   1_555 1_555 1_555 no
   C(31)     C(36)     H(36C)    111.1(5)   1_555 1_555 1_555 no
   C(31)     C(36)     H(36A)    110.5(5)   1_555 1_555 1_555 no
   C(31)     C(36)     H(36B)    110.4(5)   1_555 1_555 1_555 no
   H(36C)    C(36)     H(36A)    108.3(6)   1_555 1_555 1_555 no
   H(36C)    C(36)     H(36B)    108.4(6)   1_555 1_555 1_555 no
   H(36A)    C(36)     H(36B)    108.0(6)   1_555 1_555 1_555 no
#---------------------------------------------------------------------------
loop_
_geom_contact_atom_site_label_1
_geom_contact_atom_site_label_2
_geom_contact_distance
_geom_contact_site_symmetry_1
_geom_contact_site_symmetry_2
_geom_contact_publ_flag
 Ru(1)     Ru(2)     2.7943(6)  1_555 1_555 ?
 Ru(1)     Ru(3)     2.7718(6)  1_555 1_555 ?
 Ru(2)     Ru(3)     2.7450(7)  1_555 1_555 ?
 C(32)     C(32)     3.52(1)    1_555 2_655 ?
#---------------------------------------------------------------------------
_publ_requested_journal               ' Organometallics'

_publ_contact_author
;
 Hiroharu SUZUKI
 2-12-1 O-okayama, Meguro-Ku, Tokyo 152-8552, Japan
;
_publ_contact_letter
;
    ENTER TEXT OF LETTER
;

_publ_requested_coeditor_name          ?
_publ_contact_author_phone            ' +81-3-5734-2148 '
_publ_contact_author_fax              ' +81-3-5734-2148 '
_publ_contact_author_email            ' hiroharu@o.cc.titech.ac.jp '
loop_
_publ_author_name
_publ_author_address
' Toshiro TAKAO
  Toshifumi TAKEMORI
  Makoto MORIYA
  Hiroharu SUZUKI '
;
  2-12-1 O-okayama, Meguro-Ku, Tokyo 152-8552, Japan
;

_publ_section_title
;
 Skeletal Rearrangement of a C2 Unit on a Triruthenium Cluster.
 Synthesis of m-Ethylidene, m3-Ethylidyne, and m-Vinylidene Complexes
 by the Reaction of {Cp*Ru(m-H)}3(m3-H)2 with Acetylene.
;

_publ_section_abstract
;
    ENTER ABSTRACT
;

_publ_section_experimental
;
    ENTER EXPERIMENTAL SECTION
;

_publ_section_comment
;
    ENTER TEXT
;

_publ_section_references
;
    ENTER OTHER REFERENCES
Molecular Structure Corporation. (1995). teXsan.
Single Crystal Structure Analysis Software. Version 1.7.
MSC, 3200 Research Forest Drive, The Woodlands, TX 77381, USA.
North, A.C.T., Phillips, D. C. & Mathews, F. S. (1968).
Acta Cryst. A24, 351-359.
;

_publ_section_acknowledgements
;
    ENTER ACKNOWLEDGEMENTS
;

_publ_section_table_legends
;
    ENTER TABLE LEGENDS
;

_publ_section_figure_captions
;
    ENTER FIGURE CAPTIONS
;

#===END
